# Supplementary material
Source: HighWire-hosted journal article supplement (doi:10.1101/rna.078746.121)
Supplement: Supplemental_Figure_S1_Legend_corrected.docx [file Supplemental_Figure_S1_Legend_corrected.docx]

**Supplemental Figure S1**. Analyses of periodate-treated and untreated small RNAs.

(*A*) Changes in miRNA levels observed upon loss of Dora in total-sRNA samples, as measured using sRNA-seq (replotted from Shi et al. 2020). Each point represents the mean from three biological replicates, as determined by DESeq. For both genotypes, each replicate used a different clonal line. Results for miRNAs significantly upregulated upon loss of Dora (adjusted *p* < 2 x 10-7) and the passenger strands of these Dora-sensitive miRNAs are shown in red and blue, respectively. (*B*) Enrichment in siRNAs observed in sRNA-seq libraries following periodate treatment. For each siRNA locus passing both the expression cutoff (RPKM greater than 5 in all samples) and reproducibility requirement (coefficient of variation of RPKM values for all three biological replicates within each genotype less than 1.0), mean read abundance (in RPKM) from the treated samples is plotted as a function of the mean abundance from the untreated samples. (*C*) Validation of periodate treatment, as indicated by correspondence between measured Ago2-enrichement values and values reported previously (Reichholf et al. 2019). For each miRNA, Ago2 enrichment was inferred by dividing the average fraction of miRNA reads corresponding to that miRNA in the periodate-treated libraries by the average fraction of miRNA reads corresponding to that miRNA in the untreated libraries. Spearman *R* for the comparison is shown.
