# Supplementary material
Source: HighWire-hosted journal article supplement (doi:10.1101/rna.078746.121)
Supplement: Supplemental_Table_S1_corrected.xlsx [file Supplemental_Table_S1_corrected.xlsx]

## Sheet: miRNA_FC_summary_table.csv
Supplemental Table S1. Fold-changes in miRNAs observed upon loss of Dora in different contexts.
Log2 fold-changes (FC) upon loss of Dora and the associated adjusted p values (padj), as determined by DESeq2, are tabulated for libraries from total sRNA samples (total), periodate-treated sRNA samples (tr), and Ago1 IP samples (Ago1), and libraries from Ago2 IP carried out in the hen1 background (Ago2). miRNAs used for siRNA normalization for either total sRNA libraries, Ago1 co-IP libraries, a…
miRNA	total.FC	total.padj	tr.FC	tr.padj	Ago1.FC	Ago1.padj	Ago2.FC	Ago2.padj	norm1	norm2
dme-bantam-3p	-0.108026	0.89961	-0.32163	0.979476	-0.840791	4.49429e-13	-0.420491	0.0367607	TRUE	FALSE
dme-bantam-5p	-0.0499034	0.964571	0.222875	0.638089	-0.189459	0.349607	-0.00716642	0.991449	FALSE	TRUE
dme-miR-1002-5p	1.26911	2.55153e-07	NA	NA	1.27254	2.8377e-10	NA	NA	FALSE	FALSE
dme-miR-1003-3p	-0.574986	0.00238789	-0.489227	0.549478	-0.788082	5.30942e-18	0.0720669	0.991449	TRUE	FALSE
dme-miR-1005-3p	-0.921024	0.231059	NA	NA	0.0797104	0.867939	-0.202034	0.991449	FALSE	FALSE
dme-miR-1006-3p	-0.623908	0.0173597	-0.265635	0.979476	-0.711015	3.31166e-10	-0.183444	0.991449	FALSE	FALSE
dme-miR-1007-3p	-0.873111	0.00175204	-0.0272874	0.998686	-0.707516	0.00787747	NA	NA	FALSE	FALSE
dme-miR-1008-3p	-1.03367	0.0363494	-1.08131	0.549478	-0.730767	7.44615e-12	-0.834092	0.470599	FALSE	FALSE
dme-miR-1009-3p	-1.69932	7.01928e-05	NA	NA	-1.28615	2.34133e-06	NA	NA	FALSE	FALSE
dme-miR-1012-3p	3.34315	1.05214e-07	0.524959	0.979476	NA	NA	NA	NA	FALSE	FALSE
dme-miR-11-3p	0.0195621	0.998056	0.314906	0.599172	-0.216243	0.271303	0.121484	0.837184	FALSE	FALSE
dme-miR-11-5p	0.18189	0.70859	0.270622	0.89081	0.0052904	0.977742	-0.0317228	0.991449	FALSE	FALSE
dme-miR-12-3p	0.881269	0.088975	1.11005	0.172796	0.864585	0.084357	-0.0785527	0.991449	FALSE	FALSE
dme-miR-12-5p	4.00846	1.0318e-24	0.787383	0.502805	5.6859	1.39562e-91	0.310828	0.837184	FALSE	FALSE
dme-miR-13a-3p	0.13219	0.996012	NA	NA	-0.295584	0.349607	NA	NA	FALSE	FALSE
dme-miR-13b-2-5p	0.417206	0.273978	0.593254	0.502805	-0.0956753	0.741958	0.381593	0.262732	FALSE	TRUE
dme-miR-13b-3p	0.040443	0.998056	0.276631	0.903836	-0.322905	0.0967098	0.281916	0.634834	FALSE	FALSE
dme-miR-14-3p	0.000183518	0.999035	-0.282185	0.979476	-0.2034	0.21901	-0.154974	0.991449	TRUE	FALSE
dme-miR-14-5p	-0.0307352	0.998056	0.256523	0.876404	-0.299777	0.407584	0.370682	0.551752	FALSE	FALSE
dme-miR-184-3p	0.66396	0.0993568	0.315148	0.549478	0.230369	0.287442	0.0553336	0.991449	TRUE	FALSE
dme-miR-184-5p	0.482917	0.0564029	0.489631	0.599172	0.407929	0.321004	-0.0173104	0.991449	FALSE	TRUE
dme-miR-190-3p	-0.00562153	0.998056	0.0240037	0.993187	-0.461711	0.000658192	0.0612281	0.991449	FALSE	FALSE
dme-miR-190-5p	2.72813	2.58325e-85	0.105475	0.979476	4.63899	0	0.12064	0.823032	FALSE	FALSE
dme-miR-2279-3p	-0.530296	0.554806	NA	NA	-0.795874	0.00392307	NA	NA	FALSE	FALSE
dme-miR-2279-5p	-0.233474	0.847744	-0.220991	0.979476	-0.501813	0.319745	-0.331419	0.991449	FALSE	FALSE
dme-miR-252-5p	-2.01968	7.01928e-05	-2.01039	0.00128773	NA	NA	NA	NA	FALSE	FALSE
dme-miR-263a-5p	0.713225	0.0117947	0.504721	0.549478	1.21511	5.29114e-05	0.270374	0.837184	FALSE	FALSE
dme-miR-275-3p	0.910995	0.00403843	-0.000568561	0.998686	0.621875	1.19004e-05	0.518811	0.0489094	FALSE	FALSE
dme-miR-275-5p	0.109339	0.908675	0.00479234	0.998686	1.34325	2.2476e-10	0.0624626	0.991449	FALSE	FALSE
dme-miR-276a-3p	0.290163	0.724466	0.0941339	0.979476	0.399433	0.237955	0.22424	0.991449	TRUE	FALSE
dme-miR-277-3p	1.69905	1.80149e-13	-0.104616	0.979476	2.50294	2.42059e-43	0.22564	0.991449	FALSE	FALSE
dme-miR-277-5p	0.499574	0.466856	-0.229344	0.979476	-0.0136421	0.976068	-0.291583	0.991449	FALSE	FALSE
dme-miR-278-3p	-2.47504	2.41639e-05	-2.35747	0.00128773	NA	NA	NA	NA	FALSE	FALSE
dme-miR-279-3p	2.01852	3.16895e-27	0.140373	0.979476	2.09774	1.42343e-48	-0.157609	0.883089	FALSE	FALSE
dme-miR-279-5p	-0.0197673	0.998056	0.134846	0.979476	-0.0708258	0.918616	0.00312151	0.995099	FALSE	FALSE
dme-miR-281-1-5p	-0.652188	0.24232	-0.500655	0.887384	-0.29525	0.360353	-0.0477677	0.991449	FALSE	FALSE
dme-miR-281-2-5p	-0.902432	0.00120856	-0.964442	0.570179	-0.381277	0.248099	-0.0504981	0.991449	FALSE	FALSE
dme-miR-281-3p	-0.721865	0.00365973	-1.28879	0.502805	-0.21398	0.528379	-0.115675	0.991449	FALSE	FALSE
dme-miR-282-3p	-0.495901	0.166329	-0.115283	0.979476	-0.263663	0.242413	-0.0518485	0.991449	FALSE	FALSE
dme-miR-282-5p	-0.578025	0.268449	0.146876	0.979476	-0.395804	0.093329	-0.670756	0.210119	TRUE	FALSE
dme-miR-283-3p	1.12121	0.00778273	0.878695	0.569703	NA	NA	-0.00464026	0.995099	FALSE	FALSE
dme-miR-283-5p	1.11933	0.0115869	0.690522	0.549478	1.03336	0.00738775	0.15605	0.991449	FALSE	FALSE
dme-miR-2a-1-5p	-0.00797177	0.998056	-0.0590641	0.979476	-0.934832	7.13927e-14	0.0450372	0.991449	FALSE	TRUE
dme-miR-2a-2-5p	-0.274475	0.254289	-0.355042	0.599172	-0.376514	0.287442	-0.314247	0.470599	FALSE	TRUE
dme-miR-2ac-3p	-0.194496	0.528286	-0.0260843	0.998686	-0.431553	0.00434463	0.166391	0.991449	TRUE	FALSE
dme-miR-2b-1-5p	-0.408261	0.693832	0.273648	0.979476	NA	NA	0.324875	0.823032	FALSE	FALSE
dme-miR-2b-2-5p	0.268888	0.483327	0.146203	0.979476	0.246652	0.099934	0.0268293	0.991449	FALSE	TRUE
dme-miR-2b-3p	0.34083	0.26843	-0.0239507	0.998686	0.0259243	0.918616	0.177245	0.991449	TRUE	FALSE
dme-miR-304-3p	1.14832	0.0286817	0.733458	0.569703	1.27037	0.000153104	0.481786	0.823032	FALSE	FALSE
dme-miR-304-5p	0.604486	0.26843	0.0812763	0.979909	0.291438	0.478352	0.132069	0.991449	TRUE	FALSE
dme-miR-305-3p	0.353099	0.612321	0.424621	0.599172	0.374986	0.0480405	0.336729	0.199451	FALSE	FALSE
dme-miR-305-5p	0.495692	0.00997678	0.0579256	0.979476	0.76049	3.31166e-10	0.0905722	0.991449	FALSE	FALSE
dme-miR-306-3p	-0.322891	0.647819	0.325227	0.89081	-0.242809	0.523098	0.0754658	0.991449	FALSE	FALSE
dme-miR-306-5p	-0.346616	0.54618	-0.345718	0.898929	-0.486229	0.00039029	-0.310588	0.823032	TRUE	FALSE
dme-miR-308-3p	-0.700207	0.000999211	-0.709407	0.887384	-0.035488	0.917499	-0.230018	0.991449	FALSE	FALSE
dme-miR-308-5p	-0.248552	0.760853	0.0399262	0.979909	0.783215	2.76208e-07	-0.151834	0.883089	FALSE	TRUE
dme-miR-317-3p	0.0962363	0.89961	-0.415001	0.887384	0.0457471	0.866411	-0.0457551	0.991449	TRUE	FALSE
dme-miR-317-5p	0.0225747	0.998056	-0.237536	0.89081	0.355205	0.0723071	-0.176397	0.991449	FALSE	FALSE
dme-miR-318-3p	-0.665021	0.403492	NA	NA	0.0150029	0.976068	NA	NA	FALSE	FALSE
dme-miR-33-3p	-0.337838	0.237304	-0.321415	0.502805	-0.0784803	0.874386	-0.0107022	0.991449	FALSE	FALSE
dme-miR-33-5p	-0.0274768	0.998056	-0.516833	0.502805	0.626374	6.83584e-07	-0.139344	0.837184	FALSE	FALSE
dme-miR-34-3p	-0.188619	0.561858	-0.000722167	0.998686	-0.372244	0.0376943	-0.162484	0.991449	TRUE	FALSE
dme-miR-34-5p	0.76166	0.00723429	0.20003	0.979476	0.8589	1.84322e-09	0.0619195	0.991449	TRUE	FALSE
dme-miR-4968-3p	-0.397262	0.753443	-0.369292	0.979476	NA	NA	-0.448246	0.991449	FALSE	FALSE
dme-miR-6-3p	-0.453195	0.584912	NA	NA	-0.728761	0.00229048	NA	NA	FALSE	FALSE
dme-miR-7-3p	0.0183761	0.998056	0.12849	0.979476	0.210855	0.592326	-0.145612	0.991449	FALSE	FALSE
dme-miR-7-5p	4.03154	3.66009e-86	0.871673	0.521878	4.42698	5.97165e-121	1.49272	4.61802e-07	FALSE	FALSE
dme-miR-79-3p	-0.220805	0.365518	-0.262217	0.733721	-0.550978	0.000233908	-0.0290559	0.991449	FALSE	FALSE
dme-miR-79-5p	-0.334907	0.454488	NA	NA	NA	NA	NA	NA	FALSE	FALSE
dme-miR-8-3p	0.0424449	0.998056	-0.0314384	0.998686	-0.626913	0.102202	-0.245209	0.991449	FALSE	FALSE
dme-miR-8-5p	0.124824	0.955071	0.151714	0.979476	-0.24204	0.592326	-0.278662	0.991449	FALSE	TRUE
dme-miR-92b-3p	0.991898	0.0635465	-0.522084	0.979476	0.660123	0.143274	-0.692132	0.837184	FALSE	FALSE
dme-miR-9388-3p	-0.418902	0.0353235	-0.233509	0.876404	-0.776772	2.76024e-05	-0.271826	0.262732	FALSE	FALSE
dme-miR-9388-5p	-1.33612	0.00171018	-1.13358	0.0170546	2.14166	1.18202e-21	-0.519921	0.275269	FALSE	FALSE
dme-miR-965-3p	0.469089	0.404223	0.00909811	0.998686	0.498571	9.19702e-07	0.132673	0.991449	TRUE	FALSE
dme-miR-965-5p	-0.021458	0.998056	0.433912	0.733721	-0.483912	0.0909005	0.58471	0.61497	FALSE	FALSE
dme-miR-966-5p	-0.63061	0.247201	-0.408344	0.733721	NA	NA	0.20087	0.991449	FALSE	FALSE
dme-miR-967-5p	-0.959637	0.0604513	-0.745392	0.502805	-0.759547	0.0419423	-0.0124456	0.995099	FALSE	FALSE
dme-miR-968-5p	0.348665	0.26843	0.231889	0.979476	0.0426073	0.917499	1.00565	0.059986	FALSE	FALSE
dme-miR-970-3p	0.363564	0.593916	-0.0445001	0.979476	0.624778	0.0693401	0.0492075	0.991449	FALSE	FALSE
dme-miR-970-5p	-0.176308	0.89961	NA	NA	NA	NA	0.848199	0.883089	FALSE	FALSE
dme-miR-988-3p	-0.278565	0.26843	-0.253971	0.733721	-0.458464	1.08099e-06	-0.153258	0.823032	FALSE	FALSE
dme-miR-988-5p	-0.382658	0.0604232	-0.281702	0.569703	-0.502042	0.349607	-0.0304516	0.991449	FALSE	TRUE
dme-miR-994-5p	0.00565194	0.998056	0.327459	0.979476	NA	NA	-0.140475	0.991449	FALSE	FALSE
dme-miR-995-3p	-0.287092	0.252263	-0.317664	0.733721	-0.41457	0.000658192	-0.406335	0.537429	FALSE	FALSE
dme-miR-995-5p	-0.363459	0.561858	-0.40225	0.643526	NA	NA	-0.596247	0.991449	FALSE	FALSE
dme-miR-996-3p	2.78771	2.56784e-23	-0.0129377	0.998686	3.36836	9.69925e-162	-0.0595444	0.991449	FALSE	FALSE
dme-miR-996-5p	0.0906471	0.89961	0.182447	0.887384	0.0908501	0.820898	0.0263141	0.991449	FALSE	TRUE
dme-miR-998-3p	-0.514365	0.445081	-0.568103	0.733721	-0.616727	0.21901	-0.594251	0.421963	TRUE	FALSE
dme-miR-998-5p	-0.754559	0.163479	-0.472744	0.887384	NA	NA	-0.51597	0.470599	FALSE	TRUE
dme-miR-999-3p	2.73277	5.92301e-42	-0.0322201	0.987029	2.90805	1.51326e-207	0.139954	0.991449	FALSE	FALSE
dme-miR-999-5p	-0.443244	0.554806	-0.198112	0.979476	NA	NA	0.525072	0.991449	FALSE	FALSE
dme-miR-9b-3p	-0.103932	0.880548	-1.03647	0.89081	-0.542642	0.00473056	0.0606093	0.991449	FALSE	FALSE
dme-miR-9b-5p	2.43847	1.03353e-60	0.399883	0.89081	2.73535	1.08586e-37	0.900841	0.000838817	FALSE	FALSE
dme-miR-9c-3p	0.0405401	0.998056	-0.432628	0.979476	0.322448	0.143274	-0.143601	0.991449	FALSE	FALSE
dme-miR-9c-5p	1.91948	2.3238e-39	0.176074	0.887384	4.01621	7.48742e-165	-0.0493695	0.991449	FALSE	FALSE
