# Supplementary material
Source: HighWire-hosted journal article supplement (doi:10.1101/rna.078746.121)
Supplement: Supplemental_Table_S3_corrected.xlsx [file Supplemental_Table_S3_corrected.xlsx]

## Sheet: siRNA_locus_FC_summary_table
Supplemental Table S3. Fold-changes in reads mapping to siRNA-generating loci observed upon loss of Dora in different contexts.
Log2 fold-changes (FC) upon loss of Dora and associated adjusted p values (padj), as determined by CuffDiff (tr, Ago1, Ago2) or DEseq2 (hen1), are tabulated for libraries from periodate-treated sRNA samples (tr) and Ago1 co-IP samples (Ago1), and libraries from Ago2 IP carried out in the hen1 background (Ago2). Also shown are fold-changes observed upon loss of Hen1 and the associated adjusted p v…
siRNA	tr.FC	tr.padj	Ago1.FC	Ago1.padj	Ago2.FC	Ago2.padj	hen1.FC	hen1.padj
CG4068	0.342542	0.732621	1.49075	0.014925	-0.031224	0.93969	-1.20007	0.0107872
cisNAT-1006	-0.883715	0.637784	NA	NA	0.071598	0.93207	-1.56786	0.207773
cisNAT-1014	-0.356142	0.797959	-0.840999	0.40344	-0.106555	0.881355	-0.487545	0.516027
cisNAT-1019	-0.365109	0.830578	NA	NA	0.0168931	0.9565	NA	NA
cisNAT-102	0.793643	0.630755	NA	NA	0.996919	0.631779	NA	NA
cisNAT-1020	-0.0716716	0.948999	NA	NA	NA	NA	NA	NA
cisNAT-1023	-0.522046	0.740116	NA	NA	-0.025488	0.957631	-0.547793	0.679174
cisNAT-1024	-0.376144	0.80221	NA	NA	-0.108855	0.880069	-0.256436	0.861434
cisNAT-103	-0.917799	0.539952	NA	NA	-1.23375	0.364072	NA	NA
cisNAT-1034	0.104211	0.922983	NA	NA	0.0540775	0.935651	0.477556	0.861434
cisNAT-1037	0.0195365	0.984059	0.813948	0.48992	-0.470436	0.554452	0.172028	0.929667
cisNAT-104	-0.189003	0.876081	NA	NA	0.00128099	0.98125	-0.697318	0.523829
cisNAT-1049	0.648501	0.676599	NA	NA	0.542345	0.676076	NA	NA
cisNAT-1051	-0.0369471	0.966855	NA	NA	0.426225	0.670976	0.16037	0.960405
cisNAT-1054	-0.156953	0.913079	NA	NA	0.204209	0.892296	-0.556506	0.863548
cisNAT-1060	1.02968	0.530071	NA	NA	0.669247	0.542157	0.0643507	0.961706
cisNAT-1061	0.387683	0.788167	0.294658	0.57293	0.238968	0.739028	-0.375803	0.805298
cisNAT-1064	-0.722987	0.620091	NA	NA	0.0999712	0.912978	-0.861679	0.727241
cisNAT-1072	-0.383138	0.770275	NA	NA	-0.509935	0.554452	-0.654357	0.564236
cisNAT-1076	-1.02707	0.539952	NA	NA	0.0112513	0.950723	-0.691212	0.835058
cisNAT-1077	-0.112209	0.929618	NA	NA	-0.089362	0.912121	-0.127843	0.950231
cisNAT-1078	0.411098	0.789502	NA	NA	NA	NA	-0.151049	0.957007
cisNAT-1079	0.289624	0.865132	NA	NA	-0.170231	0.885505	0.731615	0.799505
cisNAT-108	1.2047	0.5419	NA	NA	1.23975	0.364072	-0.567506	0.861434
cisNAT-1081	0.00566754	0.956133	NA	NA	NA	NA	NA	NA
cisNAT-1083	0.385561	0.865132	NA	NA	-0.335971	0.809736	NA	NA
cisNAT-1084	0.812999	0.633348	NA	NA	0.0646287	0.926587	0.54382	0.876858
cisNAT-1086	-0.392257	0.77534	NA	NA	0.159346	0.874104	-0.604075	0.679174
cisNAT-1088	0.224263	0.88964	NA	NA	NA	NA	NA	NA
cisNAT-1089	-0.128688	0.919134	NA	NA	-0.143311	0.852499	0.120228	0.93956
cisNAT-109	-1.1704	0.784532	NA	NA	NA	NA	NA	NA
cisNAT-1090	-0.155923	0.891354	NA	NA	0.116433	0.884083	-0.0673232	0.961706
cisNAT-1092	-0.0199465	0.983722	NA	NA	0.315681	0.72643	-1.21941	0.295498
cisNAT-1093	-0.961459	0.584358	NA	NA	0.0790925	0.908031	-0.625398	0.572411
cisNAT-1094	-0.122367	0.917755	NA	NA	0.0658091	0.947576	NA	NA
cisNAT-1099	-0.0477072	0.957488	NA	NA	NA	NA	NA	NA
cisNAT-1101	-0.823477	0.63479	NA	NA	NA	NA	NA	NA
cisNAT-1103	-0.553013	0.700977	NA	NA	-0.310718	0.686957	-1.57949	0.0961865
cisNAT-1104	-0.328366	0.826548	NA	NA	-0.330533	0.674519	-0.240755	0.864452
cisNAT-1107	0.00689205	0.994537	NA	NA	-0.212864	0.758646	-0.51566	0.727241
cisNAT-1108	-0.758597	0.583103	NA	NA	-0.0602971	0.918738	-0.781558	0.344097
cisNAT-111	0.0134573	0.990652	NA	NA	0.127735	0.876414	0.204718	0.934516
cisNAT-1110	0.368369	0.831843	NA	NA	0.423079	0.642178	-0.395165	0.861434
cisNAT-1115	1.34286	0.554493	NA	NA	NA	NA	NA	NA
cisNAT-1118	-0.628551	0.704374	NA	NA	-0.428608	0.631779	-0.169734	0.913203
cisNAT-1119	0.680234	0.656901	NA	NA	NA	NA	NA	NA
cisNAT-112	0.0870811	0.937434	NA	NA	-0.323992	0.835176	NA	NA
cisNAT-1120	-0.33464	0.824416	0.0214292	0.937287	0.0517149	0.926016	-0.556166	0.495895
cisNAT-1121	0.573919	0.645147	1.08012	0.334651	-0.0616971	0.908448	0.0482894	0.961706
cisNAT-1122	0.79929	0.660447	NA	NA	NA	NA	NA	NA
cisNAT-1124	0.337246	0.819753	NA	NA	-0.122239	0.923025	-0.215306	0.945947
cisNAT-1128	-0.388475	0.83005	NA	NA	NA	NA	NA	NA
cisNAT-113	-0.144241	0.927032	NA	NA	0.298855	0.881512	NA	NA
cisNAT-1131	0.551564	0.733862	NA	NA	0.297774	0.742439	-0.167278	0.943997
cisNAT-1133	0.746429	0.548783	NA	NA	0.477504	0.785933	0.119364	0.965651
cisNAT-1135	-0.48125	0.7509	NA	NA	-0.255568	0.774021	0.033026	0.979869
cisNAT-1136	0.317692	0.862673	NA	NA	NA	NA	NA	NA
cisNAT-1137	0.270623	0.852447	0.358706	0.652839	0.21309	0.759259	-0.42772	0.663804
cisNAT-1139	-0.531918	0.72985	0.476037	0.710113	-0.186691	0.875854	-0.78231	0.741579
cisNAT-1146	-0.124592	0.906122	-0.123303	0.803565	0.267055	0.670976	-0.302938	0.687704
cisNAT-1148	0.109582	0.929532	0.245316	0.720629	0.359203	0.58299	-0.364563	0.679174
cisNAT-1151	-0.59646	0.712845	NA	NA	-0.212807	0.767853	-2.08342	0.00150428
cisNAT-1154	1.4381	0.530071	NA	NA	-0.565282	0.784341	NA	NA
cisNAT-1158	-0.0901421	0.937434	0.783877	0.464304	-0.152532	0.840533	-0.318623	0.733138
cisNAT-1161	-0.733846	0.71543	NA	NA	0.940522	0.444252	0.848986	0.777493
cisNAT-1175	1.74853	0.527181	NA	NA	0.710849	0.509724	1.31445	0.350888
cisNAT-1177	-0.471146	0.765647	NA	NA	0.349443	0.857605	1.73831	0.374151
cisNAT-118	-1.00248	0.530071	NA	NA	0.254834	0.798665	-1.32841	0.210746
cisNAT-1185	-0.0260632	0.978761	NA	NA	0.937125	0.542157	-0.939551	0.413341
cisNAT-1187	1.37758	0.530071	NA	NA	0.143351	0.874814	1.27252	0.130768
cisNAT-1190	-0.196327	0.857198	NA	NA	-0.549181	0.534125	NA	NA
cisNAT-1197	-0.333614	0.825015	NA	NA	-0.0262702	0.950723	0.79202	0.772855
cisNAT-120	-0.0183534	0.985773	-0.20396	0.837469	0.415861	0.554452	0.302746	0.772855
cisNAT-1209	-0.0279006	0.981977	NA	NA	-0.662829	0.482544	0.183016	0.947941
cisNAT-1210	-0.494594	0.766976	NA	NA	0.430489	0.658805	-3.02542	0.00803885
cisNAT-1215	-0.242178	0.85289	NA	NA	0.0112537	0.974692	0.378514	0.821178
cisNAT-1216	0.613747	0.642659	NA	NA	-0.600828	0.554452	-0.718669	0.823028
cisNAT-1221	-0.476557	0.733339	NA	NA	-0.839132	0.393343	-1.3313	0.325397
cisNAT-1228	-0.0486726	0.964431	0.78355	0.412007	-0.219126	0.761086	-0.512191	0.464729
cisNAT-1233	-0.283872	0.849773	NA	NA	0.397286	0.670976	0.219735	0.939241
cisNAT-1253	-0.586832	0.728944	NA	NA	-0.158715	0.828532	-0.205644	0.906397
cisNAT-1255	0.285519	0.822135	NA	NA	1.08573	0.542157	0.246615	0.947941
cisNAT-1257	1.14507	0.656152	NA	NA	NA	NA	NA	NA
cisNAT-126	0.49748	0.80084	NA	NA	0.218619	0.820671	0.0457299	0.974776
cisNAT-127	0.529349	0.7783	NA	NA	NA	NA	NA	NA
cisNAT-1271	0.914669	0.694942	NA	NA	NA	NA	NA	NA
cisNAT-1278	0.377511	0.799668	0.126095	0.920322	0.338427	0.642128	-0.509367	0.66833
cisNAT-1282	-0.115024	0.913177	NA	NA	0.447458	0.554452	-0.467644	0.766119
cisNAT-1289	1.36224	0.530071	NA	NA	1.16147	0.594201	0.29406	0.937833
cisNAT-1290	0.253552	0.842037	NA	NA	-0.958628	0.554452	0.103988	0.961706
cisNAT-13	-0.385676	0.792749	NA	NA	-0.132327	0.8924	-0.343569	0.863548
cisNAT-1304	0.213173	0.913177	NA	NA	-0.447067	0.772407	NA	NA
cisNAT-1307	-0.544477	0.737434	NA	NA	0.131334	0.884083	-1.52441	0.105491
cisNAT-131	-0.0907959	0.936215	1.61946	0.257165	0.361566	0.636524	0.0754191	0.961005
cisNAT-1314	0.299384	0.79678	NA	NA	NA	NA	NA	NA
cisNAT-1323	0.0995222	0.943658	NA	NA	0.150947	0.852499	0.975938	0.512185
cisNAT-1325	0.623577	0.661628	NA	NA	0.254542	0.734111	-0.95606	0.35263
cisNAT-1327	0.329669	0.826548	NA	NA	-0.0527249	0.932883	-0.424652	0.809167
cisNAT-1328	0.747404	0.64173	NA	NA	0.807541	0.65464	NA	NA
cisNAT-1331	0.633482	0.714601	NA	NA	-0.883022	0.623452	NA	NA
cisNAT-1334	1.13366	0.530071	2.41007	0.188817	-0.0346366	0.93787	0.267442	0.876858
cisNAT-1338	-0.804367	0.612571	-0.0979487	0.914281	NA	NA	-2.01683	0.344097
cisNAT-1343	-0.0323163	0.975872	0.423198	0.694169	-0.565013	0.542157	-0.406206	0.785648
cisNAT-1354	-0.271473	0.839477	0.0419393	0.920134	0.117868	0.892296	1.39089	0.139393
cisNAT-1359	0.09831	0.936084	NA	NA	0.398504	0.595003	-0.439172	0.772855
cisNAT-136	0.404619	0.816472	0.251422	0.853873	-1.32347	0.364072	0.785706	0.720149
cisNAT-1360	-0.710604	0.560996	-0.0656137	0.890551	-0.109714	0.864565	-0.886007	0.040559
cisNAT-1361	-1.40461	0.530071	NA	NA	-0.0468098	0.943483	-3.51677	9.87695e-07
cisNAT-1365	-0.395819	0.806649	NA	NA	0.424052	0.782295	NA	NA
cisNAT-1368	-0.298741	0.83689	-0.274022	0.840029	0.395832	0.759259	1.15197	0.602823
cisNAT-1369	-2.05346	0.356966	NA	NA	-0.676421	0.737043	NA	NA
cisNAT-1373	-0.770949	0.633353	NA	NA	0.134471	0.918308	NA	NA
cisNAT-1376	-0.307634	0.826429	NA	NA	0.515979	0.621693	0.764188	0.744032
cisNAT-1381	-0.305057	0.85181	0.519773	0.606237	0.448028	0.585908	-0.435994	0.777493
cisNAT-1382	0.167898	0.88964	0.739672	0.370649	-0.0893831	0.884196	-0.835778	0.464729
cisNAT-1387	-0.559183	0.766976	NA	NA	NA	NA	NA	NA
cisNAT-1392	-0.753776	0.622508	NA	NA	-0.0242071	0.952374	0.248722	0.863548
cisNAT-1395	-0.0653711	0.94681	NA	NA	0.527202	0.809736	NA	NA
cisNAT-1396	-0.402289	0.764272	NA	NA	0.134565	0.838933	-0.751479	0.805298
cisNAT-14	-0.701194	0.638803	NA	NA	-0.159545	0.884196	0.473132	0.877724
cisNAT-1401	-0.101057	0.930463	NA	NA	0.332577	0.748287	-0.999798	0.626228
cisNAT-1404	0.329707	0.868932	NA	NA	NA	NA	NA	NA
cisNAT-1406	-1.61906	0.530071	NA	NA	NA	NA	NA	NA
cisNAT-1408	0.658588	0.758869	NA	NA	NA	NA	NA	NA
cisNAT-1409	1.04862	0.539952	NA	NA	-0.17207	0.904948	NA	NA
cisNAT-1411	0.289885	0.846186	NA	NA	NA	NA	-0.849224	0.761173
cisNAT-142	-0.537298	0.741536	NA	NA	-0.206399	0.759314	-0.000726289	0.998381
cisNAT-1425	-0.846807	0.598297	NA	NA	NA	NA	NA	NA
cisNAT-1428	0.0266033	0.950527	NA	NA	-1.23729	0.516509	NA	NA
cisNAT-145	-0.176684	0.891981	1.1687	0.358739	-0.148304	0.828532	-1.152	0.188336
cisNAT-1458	0.173363	0.88964	0.993135	0.517985	0.695416	0.364072	-0.797705	0.193098
cisNAT-147	-0.23843	0.852447	NA	NA	0.00737431	0.96571	-0.683606	0.799505
cisNAT-1470	-1.64752	0.530071	NA	NA	NA	NA	NA	NA
cisNAT-1477	0.247124	0.852661	0.698433	0.256264	0.508139	0.542157	-0.855745	0.0513552
cisNAT-1482	-0.306673	0.818567	0.766446	0.538542	-0.0910107	0.899481	-0.261901	0.876858
cisNAT-149	-0.628687	0.638803	NA	NA	0.84983	0.542157	-1.11932	0.477586
cisNAT-1491	-0.455721	0.771302	-0.450187	0.782321	-0.260288	0.895495	NA	NA
cisNAT-1495	1.59156	0.530071	NA	NA	NA	NA	NA	NA
cisNAT-150	-1.36115	0.539952	NA	NA	-1.90176	0.534125	NA	NA
cisNAT-1507	-0.839606	0.655429	NA	NA	NA	NA	NA	NA
cisNAT-1509	-0.0821231	0.938421	NA	NA	0.466232	0.636488	0.128182	0.961706
cisNAT-1521	1.19693	0.539952	NA	NA	-0.121122	0.937172	NA	NA
cisNAT-1527	-1.10697	0.448891	NA	NA	NA	NA	NA	NA
cisNAT-1528	-0.284778	0.867153	NA	NA	0.0957621	0.938103	NA	NA
cisNAT-1531	-1.55779	0.530071	NA	NA	0.495819	0.828532	NA	NA
cisNAT-1537	0.239419	0.834197	NA	NA	0.186755	0.735727	1.69875	0.00112802
cisNAT-1553	0.652674	0.684391	NA	NA	1.08431	0.642128	NA	NA
cisNAT-1557	-0.444295	0.842037	NA	NA	NA	NA	NA	NA
cisNAT-1562	-0.877057	0.546883	NA	NA	NA	NA	NA	NA
cisNAT-1563	0.773313	0.624784	NA	NA	-0.140598	0.884196	0.124899	0.943997
cisNAT-1566	0.62785	0.725544	NA	NA	0.42784	0.84344	NA	NA
cisNAT-157	-0.419543	0.791709	NA	NA	0.500542	0.542157	-1.1746	0.0626826
cisNAT-1573	1.75172	0.356966	NA	NA	1.48427	0.364072	0.21101	0.943997
cisNAT-1590	-0.479481	0.799668	NA	NA	-0.124714	0.912121	-2.0658	0.143689
cisNAT-1605	0.540633	0.74049	NA	NA	NA	NA	0.235528	0.943997
cisNAT-1610	1.08326	0.603004	NA	NA	NA	NA	NA	NA
cisNAT-1615	0.312335	0.852447	NA	NA	NA	NA	NA	NA
cisNAT-1620	-0.00551803	0.99332	-0.472145	0.667307	-0.104793	0.884196	0.873647	0.413341
cisNAT-1621	0.14152	0.911686	NA	NA	0.677746	0.542157	-0.974372	0.515966
cisNAT-163	-0.512217	0.742253	NA	NA	NA	NA	NA	NA
cisNAT-1632	0.153294	0.923872	NA	NA	-0.872548	0.636524	NA	NA
cisNAT-164	-0.538412	0.6541	NA	NA	-0.106031	0.912339	-0.418461	0.835058
cisNAT-165	-0.503989	0.75668	NA	NA	NA	NA	NA	NA
cisNAT-1667	0.497834	0.85289	NA	NA	0.622814	0.703352	NA	NA
cisNAT-1669	-0.268898	0.839477	NA	NA	0.0656166	0.947278	NA	NA
cisNAT-1673	0.257341	0.886446	NA	NA	0.527975	0.796885	NA	NA
cisNAT-1676	0.187918	0.929618	NA	NA	NA	NA	NA	NA
cisNAT-168	0.0404624	0.952205	0.270028	0.502644	-0.235493	0.609177	-0.159613	0.867142
cisNAT-1682	-0.193535	0.871004	NA	NA	NA	NA	NA	NA
cisNAT-17	-0.0760784	0.959712	NA	NA	0.24864	0.893051	-0.468937	0.883597
cisNAT-1701	0.0812974	0.957419	NA	NA	NA	NA	NA	NA
cisNAT-1709	0.957123	0.793017	NA	NA	NA	NA	NA	NA
cisNAT-1749	0.505481	0.785834	NA	NA	NA	NA	NA	NA
cisNAT-175	-0.0938583	0.9385	NA	NA	NA	NA	0.19025	0.93956
cisNAT-1751	0.207918	0.865463	NA	NA	-0.183485	0.923447	NA	NA
cisNAT-1752	1.09734	0.539952	NA	NA	0.640111	0.743542	0.702523	0.835058
cisNAT-1753	-0.118405	0.920728	NA	NA	NA	NA	NA	NA
cisNAT-1754	1.22651	0.530071	NA	NA	-0.805837	0.554452	0.942536	0.761173
cisNAT-176	-0.425148	0.830442	NA	NA	-0.298128	0.670693	NA	NA
cisNAT-178	-0.479117	0.769944	NA	NA	-0.387706	0.604777	-0.417162	0.821178
cisNAT-180	-1.07928	0.530071	NA	NA	-0.270975	0.809736	NA	NA
cisNAT-181	-0.10779	0.924706	NA	NA	0.331037	0.7204	0.699561	0.772855
cisNAT-182	2.58215	0.356966	NA	NA	0.454058	0.706286	1.02586	0.765628
cisNAT-187	0.884176	0.545497	NA	NA	1.05814	0.554452	NA	NA
cisNAT-188	-0.215435	0.866596	NA	NA	-0.0977007	0.884196	-0.965399	0.211085
cisNAT-190	-0.779253	0.535694	NA	NA	-0.213611	0.839908	NA	NA
cisNAT-191	-0.65615	0.630595	NA	NA	-0.00478817	0.965655	-1.0463	0.333805
cisNAT-192	0.98021	0.539952	0.31031	0.624127	0.967337	0.542157	-1.68298	0.454845
cisNAT-2	0.773634	0.632783	NA	NA	-0.145176	0.881765	0.242965	0.93956
cisNAT-202	0.665051	0.626057	NA	NA	0.436563	0.642128	0.334138	0.864192
cisNAT-206	-1.54247	0.468977	NA	NA	NA	NA	-0.137991	0.961706
cisNAT-21	-0.168128	0.911245	NA	NA	-0.114254	0.93787	NA	NA
cisNAT-211	0.254106	0.843302	NA	NA	0.114038	0.904948	0.494777	0.835058
cisNAT-216	-0.0083103	0.986259	NA	NA	1.03228	0.542157	0.613169	0.850475
cisNAT-217	-0.158769	0.91252	NA	NA	-1.07209	0.391372	NA	NA
cisNAT-221	-0.307381	0.810354	NA	NA	-0.00289915	0.968021	0.313101	0.886003
cisNAT-226	1.9176	0.530071	NA	NA	NA	NA	NA	NA
cisNAT-229	-0.613061	0.635185	NA	NA	-0.0394821	0.960259	-0.950487	0.610535
cisNAT-230	-0.617236	0.706282	-0.0832039	0.925719	-0.26203	0.702248	-0.585621	0.41269
cisNAT-232	-0.582048	0.742253	NA	NA	0.44764	0.737043	NA	NA
cisNAT-234	-0.00395075	0.986995	NA	NA	-0.688719	0.542157	-0.831477	0.635382
cisNAT-239	-0.341678	0.809464	NA	NA	-0.478262	0.780213	NA	NA
cisNAT-240	-0.488257	0.764318	NA	NA	NA	NA	NA	NA
cisNAT-247	-0.31231	0.831878	NA	NA	-0.553387	0.739028	NA	NA
cisNAT-248	-0.700637	0.657147	0.957381	0.486442	0.0959568	0.8924	-1.97667	0.00461409
cisNAT-250	0.0246652	0.979824	NA	NA	0.0178627	0.972079	1.10306	0.413341
cisNAT-254	-0.312321	0.825015	NA	NA	-0.317454	0.642128	-0.352811	0.832768
cisNAT-258	-1.26105	0.471191	NA	NA	-0.504353	0.692067	0.595642	0.863548
cisNAT-264	0.695258	0.63273	NA	NA	-0.199182	0.833779	-0.89806	0.698018
cisNAT-265	0.126028	0.922151	NA	NA	1.07599	0.542157	0.396717	0.883597
cisNAT-266	0.0450429	0.950933	NA	NA	-0.243978	0.670976	-1.07195	0.70758
cisNAT-267	0.0441894	0.966783	NA	NA	0.181979	0.839344	-0.0680198	0.965651
cisNAT-273	0.303478	0.827198	NA	NA	-1.84767	0.636524	NA	NA
cisNAT-276	-0.615725	0.660056	0.340081	0.837385	-0.419864	0.621693	-0.237166	0.903181
cisNAT-277	-0.45328	0.76784	NA	NA	-0.879049	0.588141	1.33655	0.626228
cisNAT-284	0.840208	0.546883	NA	NA	NA	NA	NA	NA
cisNAT-285	-0.352366	0.817755	NA	NA	0.435261	0.850374	NA	NA
cisNAT-286	-0.312342	0.785362	NA	NA	-0.084591	0.901848	-0.353564	0.806169
cisNAT-292	0.424348	0.771735	NA	NA	0.333205	0.710476	0.297597	0.85832
cisNAT-293	0.166268	0.889816	NA	NA	0.525025	0.654327	-1.62901	0.353518
cisNAT-294	-0.286515	0.826968	NA	NA	-0.297435	0.742439	-0.386077	0.867142
cisNAT-297	-0.0307782	0.944018	NA	NA	NA	NA	NA	NA
cisNAT-300	0.174386	0.895378	NA	NA	-0.0117207	0.96871	-0.353953	0.777493
cisNAT-301	-0.258984	0.871853	NA	NA	-0.631751	0.670976	NA	NA
cisNAT-302	-0.0187501	0.98413	NA	NA	0.22419	0.798822	0.0657258	0.961706
cisNAT-303	-0.72127	0.577631	0.848628	0.523508	0.525248	0.542157	-1.46702	0.00615621
cisNAT-304	-0.137471	0.935092	NA	NA	-0.092303	0.947278	0.528695	0.85832
cisNAT-309	-0.314214	0.788167	0.436989	0.679722	0.156358	0.83346	-0.753703	0.375259
cisNAT-313	-0.286523	0.865132	NA	NA	NA	NA	NA	NA
cisNAT-314	-0.404613	0.765086	NA	NA	NA	NA	NA	NA
cisNAT-315	-0.222379	0.880385	NA	NA	0.477866	0.715102	0.559606	0.835058
cisNAT-320	-0.325519	0.804781	NA	NA	-0.241244	0.782848	-0.846193	0.711813
cisNAT-324	0.626178	0.75686	NA	NA	NA	NA	NA	NA
cisNAT-325	-1.84016	0.356966	NA	NA	-0.449798	0.740077	-0.406937	0.908677
cisNAT-327	0.248067	0.866596	NA	NA	-0.609992	0.555952	-0.512374	0.851027
cisNAT-329	0.608299	0.693725	NA	NA	NA	NA	NA	NA
cisNAT-33	-0.992673	0.539952	NA	NA	-0.0523984	0.958669	-2.03562	0.0901471
cisNAT-332	-0.0593735	0.954027	NA	NA	-0.298501	0.749878	NA	NA
cisNAT-335	-0.886018	0.60339	NA	NA	-0.682525	0.549937	0.15575	0.94955
cisNAT-338	0.388687	0.805232	NA	NA	0.89031	0.364072	-0.780959	0.588714
cisNAT-343	0.315955	0.842037	NA	NA	NA	NA	NA	NA
cisNAT-345	0.752437	0.539952	NA	NA	-0.966891	0.590056	NA	NA
cisNAT-350	0.471648	0.850157	NA	NA	NA	NA	NA	NA
cisNAT-351	-0.282588	0.838972	1.69441	0.370575	-0.0634871	0.912944	-0.347671	0.777493
cisNAT-352	-0.246095	0.889816	NA	NA	-0.410571	0.626511	NA	NA
cisNAT-353	0.558839	0.662158	NA	NA	-0.0343269	0.947278	-0.0373611	0.975494
cisNAT-355	0.215647	0.878558	NA	NA	-1.0122	0.554452	NA	NA
cisNAT-356	-0.16093	0.900825	NA	NA	0.949893	0.364072	-0.343246	0.863377
cisNAT-358	0.00229867	0.996569	1.49669	0.313921	-0.112113	0.884196	-0.315367	0.829325
cisNAT-359	0.0871832	0.934961	NA	NA	0.459699	0.590721	0.131308	0.94955
cisNAT-36	-0.827291	0.548847	NA	NA	-0.730938	0.447406	-2.52948	0.0118417
cisNAT-365	1.38769	0.530071	NA	NA	NA	NA	NA	NA
cisNAT-370	0.405574	0.879112	NA	NA	NA	NA	NA	NA
cisNAT-384	-0.704096	0.671113	NA	NA	NA	NA	NA	NA
cisNAT-387	-0.447387	0.727583	NA	NA	-0.497005	0.561501	-0.778451	0.417679
cisNAT-396	-0.0803459	0.934961	0.9948	0.338134	-0.251721	0.682565	-0.458125	0.679174
cisNAT-404	-0.464555	0.728251	NA	NA	0.0291186	0.96571	-1.23714	0.610535
cisNAT-41	-0.0470683	0.959436	NA	NA	-0.518931	0.675501	-0.413137	0.885496
cisNAT-414	0.409959	0.768302	NA	NA	NA	NA	0.421932	0.906121
cisNAT-42	1.73294	0.403439	NA	NA	NA	NA	NA	NA
cisNAT-422	-0.263184	0.836014	NA	NA	-0.333701	0.754174	0.356283	0.875627
cisNAT-423	0.477823	0.805233	NA	NA	0.458906	0.84269	NA	NA
cisNAT-424	-0.14666	0.895524	NA	NA	-0.141762	0.904948	-0.269671	0.945947
cisNAT-428	0.569675	0.792749	NA	NA	NA	NA	NA	NA
cisNAT-430	-0.174708	0.88944	NA	NA	0.182157	0.842167	-0.377347	0.785895
cisNAT-432	-0.108488	0.923619	NA	NA	-0.385273	0.747216	-0.46149	0.841157
cisNAT-433	0.604517	0.740336	NA	NA	NA	NA	NA	NA
cisNAT-436	0.750423	0.693587	NA	NA	NA	NA	NA	NA
cisNAT-44	-1.52172	0.530071	NA	NA	-1.32678	0.425954	NA	NA
cisNAT-440	-0.295466	0.831843	1.7365	0.19667	0.240953	0.742439	0.582655	0.375259
cisNAT-441	0.714535	0.791313	NA	NA	0.143423	0.927578	NA	NA
cisNAT-446	-0.141618	0.917288	NA	NA	-0.433211	0.675501	-0.187732	0.94955
cisNAT-448	-0.598652	0.68732	NA	NA	-0.374995	0.7204	NA	NA
cisNAT-450	-0.423128	0.741986	NA	NA	-0.326676	0.839205	NA	NA
cisNAT-454	-0.199755	0.883453	NA	NA	-0.121569	0.904948	-0.731231	0.703867
cisNAT-455	0.718237	0.696937	NA	NA	0.242494	0.881093	NA	NA
cisNAT-46	-0.460928	0.742253	NA	NA	0.729785	0.555952	-0.66288	0.835058
cisNAT-460	-0.670014	0.657665	NA	NA	-0.190106	0.82347	-0.63801	0.6815
cisNAT-464	-1.98877	0.530071	NA	NA	NA	NA	NA	NA
cisNAT-470	-0.228007	0.873421	NA	NA	0.251477	0.885505	NA	NA
cisNAT-48	-0.44245	0.772676	NA	NA	-0.487711	0.661359	NA	NA
cisNAT-481	0.258789	0.848135	1.22881	0.342744	0.586818	0.542157	-0.949734	0.302586
cisNAT-484	0.574157	0.758717	NA	NA	0.408448	0.77405	NA	NA
cisNAT-485	0.294216	0.853403	NA	NA	0.998591	0.554452	NA	NA
cisNAT-486	0.338703	0.831843	0.142202	0.839308	0.049909	0.923447	-0.492654	0.478227
cisNAT-487	0.811764	0.583295	NA	NA	0.149569	0.895873	0.409004	0.876858
cisNAT-490	0.226949	0.869438	NA	NA	0.125142	0.875854	-0.912575	0.34974
cisNAT-495	0.389171	0.7891	NA	NA	1.01521	0.553643	-0.15332	0.961706
cisNAT-497	-0.674509	0.595111	NA	NA	-0.00985696	0.948744	-0.137722	0.961706
cisNAT-5	-0.319312	0.819753	NA	NA	-0.0512984	0.93787	-0.3645	0.877724
cisNAT-500	-0.16655	0.896301	NA	NA	-0.157722	0.845396	-0.832464	0.374151
cisNAT-501	1.21723	0.539952	NA	NA	NA	NA	0.167702	0.961706
cisNAT-504	0.372361	0.810354	NA	NA	-0.0263296	0.9487	0.229216	0.934516
cisNAT-505	-0.0672254	0.952454	NA	NA	-0.408271	0.634361	0.0233482	0.979869
cisNAT-510	-0.67947	0.619908	-0.15485	0.840029	0.495034	0.542157	-1.26635	0.00604527
cisNAT-511	0.269048	0.836014	0.565584	0.62619	0.149717	0.864227	-0.517675	0.602823
cisNAT-524	-0.0689589	0.942217	NA	NA	-0.977771	0.669231	NA	NA
cisNAT-525	-0.684979	0.727583	NA	NA	0.876457	0.554452	NA	NA
cisNAT-53	-0.0875547	0.941727	NA	NA	-0.574798	0.595192	-0.0970602	0.967027
cisNAT-531	-0.831776	0.546883	NA	NA	-0.236189	0.739854	-0.882306	0.176831
cisNAT-533	1.94857	0.439811	NA	NA	NA	NA	NA	NA
cisNAT-534	-0.58941	0.639915	NA	NA	-0.223152	0.838254	-1.36527	0.54625
cisNAT-537	0.187956	0.900825	NA	NA	0.351005	0.741568	-0.306075	0.929667
cisNAT-538	-0.120196	0.914851	NA	NA	1.53926	0.367998	-0.183181	0.93956
cisNAT-546	0.88513	0.564244	NA	NA	-0.16699	0.901848	NA	NA
cisNAT-552	-0.41772	0.771735	NA	NA	0.338952	0.748145	-0.544776	0.835015
cisNAT-553	0.171304	0.920728	NA	NA	NA	NA	NA	NA
cisNAT-556	1.04589	0.539952	NA	NA	NA	NA	NA	NA
cisNAT-557	2.54399	0.356966	NA	NA	NA	NA	-0.140368	0.961706
cisNAT-559	0.434623	0.658312	NA	NA	0.659189	0.542157	-0.417339	0.854782
cisNAT-560	-0.360817	0.833332	NA	NA	-1.42917	0.516509	NA	NA
cisNAT-562	0.627014	0.721918	NA	NA	NA	NA	NA	NA
cisNAT-569	1.89446	0.356966	NA	NA	0.881423	0.542157	-0.283553	0.93956
cisNAT-570	0.20432	0.870074	NA	NA	0.454802	0.588141	0.627547	0.799505
cisNAT-571	1.1445	0.530071	NA	NA	-0.114232	0.911183	0.441313	0.824324
cisNAT-573	-0.990273	0.540297	NA	NA	NA	NA	NA	NA
cisNAT-583	0.409833	0.765086	-0.148567	0.903622	1.04443	0.483883	NA	NA
cisNAT-587	0.0334184	0.972218	1.61506	0.139922	-0.122973	0.828532	0.0251756	0.970541
cisNAT-589	-0.00845383	0.966488	NA	NA	1.54243	0.585908	NA	NA
cisNAT-59	-0.484826	0.716585	NA	NA	-0.136004	0.865101	-0.573534	0.788195
cisNAT-593	-0.420132	0.778	NA	NA	0.504629	0.574259	-2.53934	0.000918204
cisNAT-596	-0.527319	0.701857	NA	NA	0.462786	0.685058	0.251294	0.945947
cisNAT-597	-0.160292	0.891981	NA	NA	0.0858924	0.941607	NA	NA
cisNAT-598	0.555458	0.750388	NA	NA	-0.404636	0.795292	NA	NA
cisNAT-60	-0.630309	0.740815	NA	NA	NA	NA	NA	NA
cisNAT-605	-0.0659354	0.942217	NA	NA	0.10043	0.900847	-0.548388	0.777493
cisNAT-606	-0.91629	0.62772	NA	NA	-0.247552	0.749592	NA	NA
cisNAT-607	-0.140849	0.914851	NA	NA	0.0806353	0.902655	-0.190588	0.883597
cisNAT-61	-0.0607094	0.947878	NA	NA	-0.272296	0.659566	0.0152454	0.981901
cisNAT-611	0.171643	0.891376	NA	NA	0.134391	0.870242	-0.700419	0.515966
cisNAT-617	0.558247	0.693725	NA	NA	0.673723	0.7204	NA	NA
cisNAT-619	-0.0320994	0.972218	NA	NA	-0.166084	0.884196	0.0927674	0.968364
cisNAT-62	-0.96367	0.556785	NA	NA	NA	NA	NA	NA
cisNAT-620	-0.0169279	0.985605	-0.600401	0.623275	1.03136	0.364072	-1.02115	0.352983
cisNAT-621	-0.421428	0.772437	1.17137	0.258534	-0.263948	0.706779	-2.21421	1.68353e-05
cisNAT-625	0.339454	0.832819	NA	NA	0.280667	0.809736	NA	NA
cisNAT-626	0.163127	0.880808	NA	NA	0.0718153	0.928564	0.0929861	0.968364
cisNAT-63	0.549323	0.727424	NA	NA	0.168038	0.849072	0.0159464	0.987816
cisNAT-630	0.187938	0.881314	NA	NA	0.971195	0.542157	0.163779	0.945947
cisNAT-635	-0.248681	0.836014	NA	NA	0.523913	0.553641	0.525628	0.665173
cisNAT-637	0.7461	0.700977	NA	NA	NA	NA	NA	NA
cisNAT-639	0.259709	0.88964	NA	NA	NA	NA	NA	NA
cisNAT-643	1.61643	0.530071	NA	NA	NA	NA	NA	NA
cisNAT-646	0.530497	0.780129	-0.475601	0.439028	0.354515	0.7163	0.256836	0.876858
cisNAT-647	0.171353	0.886478	NA	NA	NA	NA	-0.172236	0.950231
cisNAT-652	0.165362	0.899315	NA	NA	0.314461	0.643061	-0.503038	0.464729
cisNAT-658	0.476424	0.743193	NA	NA	-0.0806173	0.913571	0.338522	0.863377
cisNAT-659	-0.479002	0.723623	NA	NA	0.705976	0.542157	NA	NA
cisNAT-663	0.0521926	0.963651	NA	NA	0.52932	0.642128	-0.764094	0.829325
cisNAT-668	-0.889497	0.611608	NA	NA	-0.681218	0.742954	NA	NA
cisNAT-669	-0.54087	0.715326	NA	NA	NA	NA	NA	NA
cisNAT-676	-0.401982	0.774919	NA	NA	0.373049	0.731723	-0.227472	0.905244
cisNAT-678	-0.24102	0.871091	0.798926	0.557356	-0.367949	0.578936	-0.84958	0.259085
cisNAT-682	-0.00877282	0.993104	1.2735	0.300444	0.464475	0.557048	-0.180273	0.907333
cisNAT-690	-0.111744	0.925755	NA	NA	-0.150849	0.842843	-0.0680942	0.960405
cisNAT-691	-0.175149	0.905193	NA	NA	-0.11906	0.886447	-0.0994148	0.961706
cisNAT-692	-0.277073	0.837734	NA	NA	0.622169	0.601273	-0.538399	0.850295
cisNAT-696	0.405707	0.79369	NA	NA	-0.33062	0.8541	NA	NA
cisNAT-699	0.821638	0.619908	NA	NA	0.0560811	0.950723	0.307274	0.934516
cisNAT-7	0.186236	0.878531	1.74064	0.313921	-0.524071	0.542157	0.699989	0.665173
cisNAT-700	0.467286	0.748152	NA	NA	-0.322935	0.696972	-1.25143	0.564236
cisNAT-701	0.311249	0.810862	NA	NA	NA	NA	NA	NA
cisNAT-705	-0.679318	0.632674	NA	NA	0.149364	0.886447	-1.79449	0.147507
cisNAT-712	0.534652	0.721918	0.259926	0.81016	0.670928	0.364072	-0.302289	0.821178
cisNAT-715	0.544511	0.672258	NA	NA	0.252459	0.755643	0.0881214	0.961706
cisNAT-718	-0.362625	0.777564	NA	NA	0.0823874	0.901142	-0.450212	0.765628
cisNAT-72	-0.381171	0.831843	NA	NA	-0.0952646	0.899481	0.190188	0.867142
cisNAT-723	-0.285058	0.837333	NA	NA	0.00256907	0.954561	NA	NA
cisNAT-726	1.05851	0.539952	NA	NA	1.00597	0.661377	NA	NA
cisNAT-727	-0.0743558	0.947675	-0.177662	0.792403	0.453995	0.542157	0.188813	0.847768
cisNAT-74	0.818822	0.608098	NA	NA	-0.356864	0.694781	0.177572	0.949068
cisNAT-751	-0.215814	0.914754	NA	NA	-0.183848	0.859833	0.420777	0.906397
cisNAT-752	-0.262613	0.876514	NA	NA	0.130952	0.899543	-0.502391	0.863548
cisNAT-754	-1.03927	0.539952	NA	NA	0.813845	0.642128	NA	NA
cisNAT-766	0.00707803	0.959735	NA	NA	-0.146933	0.923025	NA	NA
cisNAT-768	0.0616334	0.961137	NA	NA	-0.048547	0.952568	NA	NA
cisNAT-772	-0.106251	0.937434	0.140208	0.824254	0.423956	0.590056	0.177668	0.883597
cisNAT-774	0.403959	0.842037	NA	NA	-0.872548	0.636524	NA	NA
cisNAT-776	-0.230177	0.855098	NA	NA	0.62698	0.627512	-0.925657	0.75594
cisNAT-781	-0.113523	0.910702	NA	NA	0.316638	0.828035	0.256036	0.931052
cisNAT-783	-0.184242	0.88964	NA	NA	0.50865	0.729858	NA	NA
cisNAT-785	-2.11131	0.356966	NA	NA	-0.169518	0.899481	NA	NA
cisNAT-788	-0.65367	0.657147	NA	NA	0.337078	0.761267	-0.572659	0.843593
cisNAT-790	0.0347664	0.955397	NA	NA	NA	NA	NA	NA
cisNAT-792	-0.64257	0.539952	NA	NA	0.135421	0.891603	0.778093	0.766119
cisNAT-798	-2.12669	0.548847	NA	NA	NA	NA	NA	NA
cisNAT-799	-1.40041	0.530071	NA	NA	NA	NA	NA	NA
cisNAT-8	-0.594511	0.689306	NA	NA	-0.0666303	0.947172	NA	NA
cisNAT-800	-1.14782	0.672682	NA	NA	0.729612	0.835429	NA	NA
cisNAT-804	-0.0984525	0.934961	NA	NA	0.263739	0.7163	-1.05467	0.0977705
cisNAT-812	-0.165029	0.890345	NA	NA	0.194895	0.885505	NA	NA
cisNAT-813	0.25898	0.866179	NA	NA	0.166754	0.860703	-0.183133	0.94955
cisNAT-820	-0.441499	0.800383	NA	NA	NA	NA	NA	NA
cisNAT-821	0.422106	0.818567	NA	NA	NA	NA	NA	NA
cisNAT-823	-0.434336	0.766356	NA	NA	-0.212461	0.828532	-0.357663	0.847115
cisNAT-824	-0.689802	0.649652	NA	NA	0.23699	0.874562	-1.24817	0.657911
cisNAT-827	-0.619898	0.69044	0.39726	0.6044	-0.0202151	0.9565	-0.40119	0.564236
cisNAT-832	-0.159089	0.906137	NA	NA	NA	NA	NA	NA
cisNAT-837	0.677919	0.693587	NA	NA	0.190057	0.820228	-0.275927	0.900564
cisNAT-838	-0.194838	0.848135	NA	NA	0.246047	0.822091	-0.478012	0.835058
cisNAT-839	-0.328673	0.766976	NA	NA	0.400785	0.56247	0.401471	0.840528
cisNAT-840	-0.384487	0.815979	1.81157	0.342253	0.153403	0.84344	-0.73269	0.360983
cisNAT-842	0.659789	0.670469	NA	NA	NA	NA	NA	NA
cisNAT-843	-0.384068	0.839477	NA	NA	NA	NA	NA	NA
cisNAT-844	0.759812	0.603004	NA	NA	0.459096	0.642128	-0.421672	0.838457
cisNAT-849	1.61675	0.467914	NA	NA	0.828888	0.554452	NA	NA
cisNAT-852	-0.797794	0.600881	NA	NA	-0.235129	0.713542	-1.32566	0.0206062
cisNAT-853	-0.0105934	0.98763	NA	NA	-0.126569	0.884083	-0.153788	0.94955
cisNAT-860	0.338489	0.872052	NA	NA	0.673555	0.834898	NA	NA
cisNAT-863	0.155677	0.91252	NA	NA	1.03257	0.554452	NA	NA
cisNAT-869	-0.267228	0.84728	NA	NA	0.306395	0.761205	-1.58285	0.34974
cisNAT-87	-0.0770413	0.938134	1.61331	0.455243	0.344247	0.651722	0.262533	0.861434
cisNAT-872	-0.352319	0.80221	NA	NA	0.207451	0.855334	NA	NA
cisNAT-874	0.556293	0.777588	NA	NA	NA	NA	NA	NA
cisNAT-879	-0.624518	0.639915	NA	NA	-0.147383	0.885505	-0.819956	0.686951
cisNAT-88	0.590018	0.688188	NA	NA	-0.55013	0.668923	NA	NA
cisNAT-880	-0.794127	0.700977	NA	NA	NA	NA	NA	NA
cisNAT-881	-0.870332	0.667687	NA	NA	-0.726609	0.749592	NA	NA
cisNAT-885	0.197317	0.871509	0.817272	0.188817	0.134049	0.848462	-0.210843	0.825656
cisNAT-886	0.16278	0.892804	0.628281	0.300444	0.124802	0.853403	0.121345	0.883053
cisNAT-889	-0.619164	0.733339	NA	NA	NA	NA	NA	NA
cisNAT-891	-0.148134	0.919228	NA	NA	-0.0783423	0.926638	NA	NA
cisNAT-900	-0.461501	0.773673	NA	NA	NA	NA	NA	NA
cisNAT-904	-0.228315	0.85289	NA	NA	0.268256	0.849496	-0.0825866	0.968364
cisNAT-908	-0.0835012	0.943787	NA	NA	0.6362	0.572085	-0.123555	0.961706
cisNAT-911	0.615858	0.69697	NA	NA	0.679404	0.364072	-0.221607	0.863377
cisNAT-912	1.26865	0.530071	NA	NA	NA	NA	NA	NA
cisNAT-917	-0.039812	0.93305	NA	NA	NA	NA	NA	NA
cisNAT-918	-0.17313	0.923869	NA	NA	-1.01175	0.542157	NA	NA
cisNAT-922	0.265941	0.842037	NA	NA	0.0128016	0.949445	-0.504373	0.850295
cisNAT-928	-0.130044	0.91682	NA	NA	NA	NA	NA	NA
cisNAT-929	-0.374732	0.780209	NA	NA	-0.290694	0.655929	-0.419689	0.805298
cisNAT-93	-2.03684	0.356966	NA	NA	-0.223619	0.815988	NA	NA
cisNAT-932	-0.190859	0.889479	NA	NA	-0.661384	0.621693	-0.452145	0.863548
cisNAT-936	0.868552	0.531829	0.978643	0.613751	0.873538	0.364072	0.385743	0.799505
cisNAT-939	-0.120863	0.912288	0.357463	0.757824	0.165893	0.833172	0.321417	0.863377
cisNAT-941	-0.115579	0.919134	NA	NA	0.138252	0.853401	-0.202285	0.877724
cisNAT-942	-0.125657	0.916905	NA	NA	NA	NA	NA	NA
cisNAT-944	-0.19157	0.881932	NA	NA	-0.933323	0.542157	-1.37495	0.307547
cisNAT-945	-0.345169	0.866596	NA	NA	NA	NA	NA	NA
cisNAT-948	-0.717294	0.704196	NA	NA	-1.17272	0.364072	-0.850559	0.735761
cisNAT-949	-0.626105	0.746851	NA	NA	-0.733351	0.542157	-0.499498	0.867142
cisNAT-95	0.122782	0.915873	NA	NA	-0.239432	0.796885	0.980902	0.516807
cisNAT-952	-0.00908652	0.985605	NA	NA	1.33068	0.482544	0.0823419	0.966384
cisNAT-954	0.816415	0.639449	NA	NA	1.32644	0.555952	NA	NA
cisNAT-958	0.422381	0.794087	NA	NA	0.486981	0.554452	-0.455135	0.761173
cisNAT-96	0.450548	0.810165	NA	NA	NA	NA	NA	NA
cisNAT-960	0.117092	0.938421	NA	NA	NA	NA	NA	NA
cisNAT-961	0.0901408	0.934961	NA	NA	-0.0766376	0.911406	-0.151249	0.936263
cisNAT-962	-0.551502	0.727583	NA	NA	-0.28621	0.746413	-0.775907	0.635382
cisNAT-963	-0.0354569	0.937434	NA	NA	NA	NA	NA	NA
cisNAT-964	0.112963	0.923619	NA	NA	0.0834716	0.940844	-0.56521	0.863548
cisNAT-965	0.202885	0.868932	NA	NA	-0.621493	0.748145	NA	NA
cisNAT-967	0.441764	0.743087	NA	NA	0.333119	0.691173	0.0304756	0.974776
cisNAT-971	0.0447335	0.974927	NA	NA	0.262081	0.884196	NA	NA
cisNAT-972	-0.38486	0.784532	NA	NA	0.00273258	0.972079	-0.364665	0.863548
cisNAT-977	-0.663689	0.632674	1.30696	0.482038	0.569645	0.542157	-1.37863	0.0165585
cisNAT-979	-0.889339	0.548847	NA	NA	0.0851308	0.893051	-2.17449	0.000132384
cisNAT-983	-0.827859	0.530071	NA	NA	-0.302205	0.590721	-0.829723	0.777493
cisNAT-987	0.356635	0.819036	NA	NA	-0.0539956	0.9487	NA	NA
cisNAT-988	-0.742997	0.637367	NA	NA	-0.294409	0.749122	-0.435241	0.809167
cisNAT-993	0.750392	0.661628	NA	NA	NA	NA	NA	NA
cisNAT-997	0.501056	0.75686	NA	NA	0.00752902	0.972853	-0.653849	0.741579
cisNAT+1006	-1.18419	0.424408	NA	NA	-0.208385	0.791357	-1.26448	0.344097
cisNAT+1014	-0.105155	0.934596	0.48823	0.613882	-0.230374	0.7204	-0.596693	0.343987
cisNAT+1017	-0.429147	0.709915	NA	NA	-0.607985	0.549856	-0.398089	0.886003
cisNAT+1019	-0.581306	0.676764	NA	NA	0.739267	0.554452	NA	NA
cisNAT+102	1.40151	0.531829	NA	NA	NA	NA	NA	NA
cisNAT+1020	-0.978406	0.657147	NA	NA	NA	NA	NA	NA
cisNAT+1023	-0.153983	0.906137	0.51159	0.667307	-0.0643127	0.911667	-0.451642	0.799505
cisNAT+1024	-0.270725	0.852554	NA	NA	-0.0532929	0.932683	-0.516175	0.708509
cisNAT+103	-0.352429	0.831843	NA	NA	0.0483097	0.950723	NA	NA
cisNAT+1034	-0.892781	0.556785	NA	NA	0.131752	0.884196	-0.571771	0.843593
cisNAT+1037	-0.405449	0.792749	-0.379115	0.785251	-0.590336	0.542157	0.629493	0.676704
cisNAT+104	-0.0807053	0.952454	NA	NA	0.036884	0.947172	-1.01153	0.413341
cisNAT+1040	1.33495	0.540413	NA	NA	NA	NA	NA	NA
cisNAT+1049	0.818656	0.614803	NA	NA	-0.0749077	0.946855	NA	NA
cisNAT+1051	-0.29415	0.832642	NA	NA	0.0502125	0.945586	0.524625	0.847115
cisNAT+1054	0.126617	0.919609	NA	NA	NA	NA	-0.281958	0.937833
cisNAT+1056	-1.50091	0.530071	NA	NA	-0.701081	0.542157	NA	NA
cisNAT+1060	1.00731	0.530071	-0.35939	0.798673	-0.058505	0.91761	0.0778157	0.961706
cisNAT+1061	0.714551	0.648191	NA	NA	0.0651539	0.913627	-0.205341	0.876858
cisNAT+1064	-0.0523249	0.964431	NA	NA	0.292508	0.835176	-0.532039	0.871285
cisNAT+1072	0.0942092	0.936636	NA	NA	-0.0421238	0.951978	0.420556	0.821178
cisNAT+1075	-0.375686	0.758717	NA	NA	NA	NA	NA	NA
cisNAT+1076	-0.209589	0.873097	NA	NA	-0.199266	0.873382	-1.18908	0.635382
cisNAT+1077	0.230478	0.855645	NA	NA	-0.419105	0.66121	-0.072071	0.968364
cisNAT+1078	0.231372	0.85289	NA	NA	-0.791753	0.542157	-0.0757306	0.968364
cisNAT+1079	0.141584	0.88687	NA	NA	0.183558	0.874562	-0.209691	0.929667
cisNAT+108	0.928793	0.530071	NA	NA	1.34002	0.364072	-0.0755778	0.961706
cisNAT+1083	-0.361699	0.764284	NA	NA	-0.824735	0.542157	NA	NA
cisNAT+1084	0.675086	0.700977	NA	NA	-0.467194	0.709012	1.15085	0.708509
cisNAT+1086	-0.66976	0.635476	NA	NA	-0.584634	0.631779	-0.69335	0.689751
cisNAT+1088	0.0523501	0.941857	NA	NA	NA	NA	NA	NA
cisNAT+1089	-0.282054	0.842844	NA	NA	-0.460067	0.554452	0.201675	0.885251
cisNAT+1090	-0.307761	0.847876	NA	NA	-0.292238	0.710476	-0.031645	0.975996
cisNAT+1092	0.0571243	0.95636	NA	NA	-0.190983	0.785933	-0.455713	0.811
cisNAT+1093	-0.64236	0.665507	NA	NA	-0.207667	0.763955	-0.663249	0.479805
cisNAT+1094	0.758824	0.578458	NA	NA	0.122181	0.911183	0.941199	0.777493
cisNAT+1097	0.174791	0.898433	NA	NA	NA	NA	NA	NA
cisNAT+1099	0.170818	0.891981	NA	NA	0.100684	0.918738	NA	NA
cisNAT+1103	-0.276769	0.840071	NA	NA	-0.0891863	0.907809	-1.1165	0.321029
cisNAT+1104	-0.228672	0.850481	NA	NA	-0.152954	0.838933	-0.442044	0.693939
cisNAT+1107	-0.0690572	0.950806	NA	NA	0.069762	0.914164	-0.682006	0.6301
cisNAT+1108	-0.795753	0.64173	NA	NA	0.15611	0.842953	-0.805205	0.375259
cisNAT+111	0.279219	0.826548	NA	NA	0.197677	0.809393	0.18434	0.934516
cisNAT+1110	0.0741925	0.943787	NA	NA	-0.199063	0.785933	-0.67355	0.626228
cisNAT+1118	-0.219678	0.857408	NA	NA	-0.576754	0.542157	-0.102943	0.943997
cisNAT+1120	-0.176333	0.89679	0.468332	0.604478	0.287349	0.693203	-0.745777	0.211085
cisNAT+1121	0.554378	0.723623	0.99034	0.599593	-0.0880925	0.895801	0.226065	0.850295
cisNAT+1122	-0.444295	0.806649	NA	NA	NA	NA	NA	NA
cisNAT+1124	0.767777	0.555857	NA	NA	-0.457643	0.619398	0.100229	0.965651
cisNAT+1128	-0.570026	0.690291	NA	NA	NA	NA	NA	NA
cisNAT+113	-0.157254	0.88687	NA	NA	0.487265	0.702248	NA	NA
cisNAT+1131	0.313027	0.830442	NA	NA	0.558064	0.542157	-0.356079	0.863377
cisNAT+1132	-0.462446	0.766388	NA	NA	NA	NA	NA	NA
cisNAT+1133	-0.560555	0.808761	NA	NA	0.270623	0.885505	NA	NA
cisNAT+1135	-0.223054	0.866596	NA	NA	-0.550514	0.549937	-0.206905	0.930988
cisNAT+1136	0.933504	0.676102	NA	NA	-1.24004	0.542157	NA	NA
cisNAT+1137	-0.121416	0.913522	0.890088	0.342253	0.249435	0.709025	-0.372722	0.772855
cisNAT+1139	0.101987	0.943349	NA	NA	-1.42012	0.631779	NA	NA
cisNAT+1146	-0.138512	0.919609	0.397147	0.523508	0.148871	0.839205	-0.289142	0.727241
cisNAT+1148	0.369086	0.791309	0.619403	0.419323	0.409654	0.554452	-0.629144	0.344097
cisNAT+1151	-0.57579	0.722949	NA	NA	-0.236375	0.75172	-2.09714	0.00194944
cisNAT+1154	0.137449	0.929607	NA	NA	-0.148035	0.931813	NA	NA
cisNAT+1158	-0.0959738	0.924706	0.199936	0.812735	0.145807	0.837969	-0.502908	0.428855
cisNAT+1159	-0.551242	0.76215	NA	NA	NA	NA	NA	NA
cisNAT+1161	-0.505485	0.687854	NA	NA	0.496799	0.542157	-0.561455	0.766119
cisNAT+1167	0.481387	0.73865	NA	NA	0.166939	0.926016	NA	NA
cisNAT+1175	1.3421	0.356966	1.38795	0.309366	0.868027	0.364072	0.656344	0.689751
cisNAT+118	-0.541892	0.874806	NA	NA	NA	NA	NA	NA
cisNAT+1181	-0.160569	0.93858	0.77487	0.716626	0.180195	0.938712	-1.11362	0.0137516
cisNAT+1183	0.237732	0.893167	NA	NA	NA	NA	NA	NA
cisNAT+1185	0.0301063	0.973155	NA	NA	-0.193511	0.856093	0.171847	0.943997
cisNAT+1187	1.37303	0.479292	NA	NA	0.619695	0.542157	1.47015	0.0626826
cisNAT+1197	-0.351695	0.797698	NA	NA	0.2144	0.881512	0.212148	0.930988
cisNAT+120	-0.024646	0.982046	0.014715	0.941627	0.24672	0.739854	0.516554	0.431665
cisNAT+1209	-0.153143	0.929607	NA	NA	-1.15388	0.542157	NA	NA
cisNAT+1210	-0.196385	0.878531	NA	NA	0.566016	0.542157	-2.68606	0.0118417
cisNAT+1212	-1.14473	0.356966	NA	NA	0.165622	0.841733	-1.06814	0.374206
cisNAT+1213	-1.21445	0.356966	0.590771	0.387237	-0.0863201	0.911183	-1.76951	9.87695e-07
cisNAT+1215	-0.454647	0.728034	NA	NA	-0.0531243	0.932683	0.108268	0.94955
cisNAT+1216	0.455942	0.738096	NA	NA	0.114962	0.899481	NA	NA
cisNAT+1221	-0.214047	0.875269	NA	NA	-0.450606	0.645206	-0.903183	0.631613
cisNAT+1228	-0.148016	0.88964	0.0283815	0.941627	-0.380733	0.554452	-0.592955	0.374151
cisNAT+1233	-0.527802	0.728631	-0.271446	0.845285	0.178317	0.841733	0.276581	0.901995
cisNAT+1251	0.338489	0.880808	NA	NA	NA	NA	NA	NA
cisNAT+1253	-0.671549	0.668631	0.044966	0.93907	-0.282415	0.697304	-0.00949822	0.98992
cisNAT+1255	-0.577653	0.719568	NA	NA	-0.845872	0.471977	-0.148317	0.961706
cisNAT+1257	0.0242826	0.975872	NA	NA	-0.0807892	0.911667	NA	NA
cisNAT+126	-0.37039	0.746851	NA	NA	-0.1274	0.874405	-0.48796	0.821178
cisNAT+1261	-1.16094	0.403981	NA	NA	-0.0663477	0.911724	NA	NA
cisNAT+127	-1.00673	0.530071	NA	NA	0.0968129	0.944487	NA	NA
cisNAT+1271	-0.242305	0.830578	NA	NA	-0.494566	0.739854	-0.2557	0.93956
cisNAT+1273	-0.58024	0.632783	NA	NA	-1.68922	0.554452	-0.15288	0.960405
cisNAT+1278	0.165008	0.895088	NA	NA	0.48102	0.549944	-0.541619	0.614458
cisNAT+1279	-0.857312	0.640741	NA	NA	0.389751	0.849222	NA	NA
cisNAT+1282	-0.0307203	0.974927	NA	NA	0.69087	0.517219	-0.84571	0.431159
cisNAT+1289	1.95245	0.356966	NA	NA	1.77269	0.364072	0.328501	0.906193
cisNAT+1290	0.592479	0.701276	NA	NA	-0.848134	0.542157	0.714401	0.821178
cisNAT+1291	-0.0603193	0.947675	NA	NA	NA	NA	NA	NA
cisNAT+13	-0.405369	0.769233	NA	NA	0.438051	0.645206	-0.330366	0.883775
cisNAT+1306	-0.176459	0.891981	NA	NA	-0.0406522	0.92986	NA	NA
cisNAT+1307	-0.562131	0.694186	NA	NA	0.370405	0.659899	-1.85016	0.0165585
cisNAT+131	0.183557	0.878531	NA	NA	0.111247	0.881765	0.241516	0.861434
cisNAT+1314	-0.609165	0.813839	NA	NA	NA	NA	NA	NA
cisNAT+1316	0.428288	0.778463	NA	NA	0.175033	0.917503	NA	NA
cisNAT+1323	0.291762	0.848512	NA	NA	0.359501	0.670693	0.599273	0.733897
cisNAT+1325	0.810057	0.620091	NA	NA	0.198847	0.767655	-1.13754	0.172589
cisNAT+1327	0.16216	0.89679	NA	NA	0.467495	0.605452	-0.62008	0.6301
cisNAT+1328	1.06782	0.554906	NA	NA	0.751765	0.780633	0.814438	0.799505
cisNAT+133	-0.0250061	0.934961	NA	NA	NA	NA	NA	NA
cisNAT+1331	-0.206415	0.863337	NA	NA	0.177146	0.881765	NA	NA
cisNAT+1334	0.896051	0.660056	NA	NA	0.372161	0.796931	0.207914	0.934516
cisNAT+1338	0.957183	0.632551	NA	NA	0.890715	0.557832	NA	NA
cisNAT+1343	-0.0815076	0.943349	NA	NA	-0.0434145	0.93969	-0.640822	0.564236
cisNAT+1354	-0.264076	0.843302	NA	NA	-0.432202	0.641442	0.245277	0.876858
cisNAT+1359	-0.0861801	0.937667	NA	NA	0.0271488	0.9487	-0.654699	0.564236
cisNAT+136	0.0909397	0.934596	NA	NA	0.0463307	0.932883	1.03487	0.523829
cisNAT+1360	-0.613863	0.703619	0.0416384	0.951212	-0.224329	0.749592	-0.849112	0.0643445
cisNAT+1361	-1.16895	0.530071	NA	NA	0.471326	0.557048	-2.15704	0.000204684
cisNAT+1363	-1.1425	0.83597	NA	NA	NA	NA	NA	NA
cisNAT+1365	0.178342	0.88964	NA	NA	0.313531	0.884083	NA	NA
cisNAT+1368	-0.402861	0.752813	NA	NA	-0.432592	0.642128	0.945685	0.54518
cisNAT+1373	0.316261	0.835475	NA	NA	NA	NA	NA	NA
cisNAT+1376	0.0190273	0.98537	NA	NA	0.342072	0.718913	-0.590289	0.788195
cisNAT+1381	-0.194187	0.870319	0.989691	0.456212	0.304439	0.663349	-0.563632	0.564236
cisNAT+1382	0.486103	0.777627	NA	NA	0.893639	0.542157	-0.504397	0.806169
cisNAT+1387	-0.690156	0.696624	NA	NA	0.100975	0.93969	NA	NA
cisNAT+1392	-0.938898	0.539952	NA	NA	-0.419546	0.597528	0.171666	0.913203
cisNAT+1395	0.141923	0.92559	NA	NA	1.00853	0.554452	1.41214	0.56765
cisNAT+1396	-0.0999164	0.947675	NA	NA	-0.18931	0.921598	NA	NA
cisNAT+14	-0.556268	0.702091	NA	NA	0.449428	0.742439	0.665565	0.821178
cisNAT+1401	-0.565973	0.710744	NA	NA	0.557229	0.645807	-0.367972	0.877724
cisNAT+1406	0.201879	0.88687	NA	NA	NA	NA	NA	NA
cisNAT+1409	1.51868	0.530071	NA	NA	0.076451	0.93969	NA	NA
cisNAT+1419	1.09276	0.544267	NA	NA	NA	NA	-0.401738	0.883597
cisNAT+142	-0.591965	0.700977	-0.146991	0.855239	-0.428583	0.554452	-0.288801	0.825656
cisNAT+1425	-0.331351	0.831878	NA	NA	NA	NA	NA	NA
cisNAT+1445	2.5352e-05	0.943735	NA	NA	-0.0685792	0.932117	NA	NA
cisNAT+145	-0.457792	0.778463	NA	NA	-0.412044	0.597931	-1.54352	0.0264917
cisNAT+1456	0.411134	0.832642	NA	NA	NA	NA	NA	NA
cisNAT+1458	0.212587	0.861088	0.838152	0.327473	0.654558	0.371146	-0.780328	0.24673
cisNAT+1462	-0.848344	0.530071	NA	NA	0.610518	0.520866	-1.01176	0.483855
cisNAT+147	-0.423953	0.765086	NA	NA	0.211353	0.840533	-0.419136	0.883597
cisNAT+1470	-1.52726	0.530071	NA	NA	NA	NA	NA	NA
cisNAT+1477	0.212474	0.870074	0.387577	0.519269	0.598988	0.409218	-0.874309	0.0372597
cisNAT+1482	-0.449207	0.764318	NA	NA	-0.446125	0.590056	-0.44651	0.835058
cisNAT+149	-0.724262	0.639449	NA	NA	-0.161748	0.864565	-0.346673	0.886003
cisNAT+1495	-0.424489	0.77534	NA	NA	0.382765	0.874104	NA	NA
cisNAT+150	-0.566903	0.684391	NA	NA	-0.551095	0.739028	NA	NA
cisNAT+1507	-0.282568	0.830629	NA	NA	NA	NA	NA	NA
cisNAT+1509	0.198243	0.877506	NA	NA	0.313613	0.740225	0.73431	0.772855
cisNAT+1521	1.21984	0.530071	NA	NA	NA	NA	NA	NA
cisNAT+1528	0.583207	0.69044	NA	NA	0.0839083	0.911427	0.133575	0.961706
cisNAT+1531	-0.674891	0.604364	NA	NA	-1.3506	0.542157	NA	NA
cisNAT+1537	0.0740922	0.956587	NA	NA	0.395035	0.79341	-0.680009	0.759742
cisNAT+1539	-0.818001	0.530071	0.859265	0.188817	0.0396877	0.926016	-3.62957	0.00461409
cisNAT+1553	0.424828	0.768726	NA	NA	0.34031	0.838933	NA	NA
cisNAT+1560	1.14987	0.530071	NA	NA	NA	NA	NA	NA
cisNAT+1563	1.02143	0.539952	0.561716	0.702496	0.376804	0.711657	0.379579	0.799505
cisNAT+1566	0.320445	0.846186	NA	NA	0.113766	0.933139	NA	NA
cisNAT+157	-0.301207	0.82185	0.816283	0.620844	0.457406	0.549937	-0.863341	0.207773
cisNAT+1573	1.49955	0.356966	NA	NA	2.01447	0.364072	-0.494171	0.861434
cisNAT+1581	0.893724	0.573484	NA	NA	-0.389364	0.76811	NA	NA
cisNAT+1590	-0.373691	0.755733	NA	NA	0.328863	0.761205	-0.741586	0.705882
cisNAT+1605	-0.0928064	0.937434	NA	NA	-0.371979	0.748145	-0.115584	0.961706
cisNAT+1610	1.15621	0.530071	NA	NA	NA	NA	NA	NA
cisNAT+1615	0.282865	0.839477	NA	NA	NA	NA	-1.00962	0.642445
cisNAT+1617	1.10266	0.530071	NA	NA	-1.19582	0.554452	1.22667	0.604193
cisNAT+1620	-0.189769	0.888062	2.15703	0.188817	-0.0243852	0.957631	-0.0163652	0.986172
cisNAT+1621	-0.176242	0.880785	NA	NA	0.33136	0.705524	-0.53499	0.821178
cisNAT+1623	-0.0371856	0.925837	NA	NA	NA	NA	NA	NA
cisNAT+163	-0.606793	0.657665	NA	NA	0.270329	0.842953	NA	NA
cisNAT+1632	0.30559	0.840579	NA	NA	NA	NA	NA	NA
cisNAT+165	-0.378704	0.77791	NA	NA	2.19924	0.554452	0.565315	0.863548
cisNAT+1650	-0.418993	0.723723	NA	NA	NA	NA	NA	NA
cisNAT+1659	-0.445153	0.708971	NA	NA	-0.356336	0.723305	-0.28886	0.937833
cisNAT+1667	-0.119451	0.916576	NA	NA	0.280925	0.827612	-1.50707	0.353518
cisNAT+1668	-0.306492	0.805235	NA	NA	-0.0706233	0.912978	NA	NA
cisNAT+1673	0.178619	0.877004	NA	NA	NA	NA	NA	NA
cisNAT+1682	0.330451	0.831843	NA	NA	-0.841936	0.675501	0.122005	0.965651
cisNAT+1687	-0.315462	0.840362	NA	NA	NA	NA	NA	NA
cisNAT+169	-0.347977	0.831843	NA	NA	0.317609	0.797406	NA	NA
cisNAT+17	-0.548294	0.685483	NA	NA	NA	NA	NA	NA
cisNAT+1700	-0.676872	0.589986	NA	NA	-1.16111	0.364072	NA	NA
cisNAT+1713	0.10362	0.91252	NA	NA	NA	NA	-0.989587	0.765628
cisNAT+1718	-0.115599	0.913522	NA	NA	-0.0509955	0.943437	0.275493	0.936263
cisNAT+172	-0.774593	0.548847	NA	NA	NA	NA	NA	NA
cisNAT+1738	-0.447174	0.741986	NA	NA	NA	NA	0.938657	0.65205
cisNAT+1749	0.429715	0.799668	NA	NA	0.028763	0.9487	-0.174979	0.961706
cisNAT+1751	0.889165	0.718882	NA	NA	NA	NA	NA	NA
cisNAT+1752	0.51252	0.741986	NA	NA	-0.565959	0.723305	0.220478	0.943997
cisNAT+1754	1.30664	0.530071	NA	NA	0.810241	0.685058	NA	NA
cisNAT+1757	-0.156348	0.928689	NA	NA	NA	NA	NA	NA
cisNAT+176	0.0202535	0.936084	NA	NA	NA	NA	NA	NA
cisNAT+1761	-0.991259	0.539952	NA	NA	0.310778	0.894024	NA	NA
cisNAT+178	-0.196434	0.865132	NA	NA	0.274649	0.737043	-0.462227	0.765628
cisNAT+179	-0.461203	0.755969	NA	NA	-0.0354352	0.944839	NA	NA
cisNAT+180	-2.59948	0.403436	NA	NA	0.66215	0.739255	NA	NA
cisNAT+181	0.236272	0.878531	NA	NA	-0.799614	0.554452	-0.0591936	0.968364
cisNAT+182	2.84993	0.356966	NA	NA	0.45093	0.718669	-0.132752	0.961706
cisNAT+187	0.739355	0.633194	NA	NA	NA	NA	NA	NA
cisNAT+188	-0.0644749	0.95329	0.796611	0.312038	-0.0964703	0.889194	-0.714496	0.375259
cisNAT+191	-0.572169	0.69044	NA	NA	-0.0576716	0.93037	-1.02585	0.360983
cisNAT+2	-0.250771	0.852447	NA	NA	0.205894	0.843468	0.337124	0.925263
cisNAT+202	-0.106167	0.944685	NA	NA	0.274825	0.847564	-0.216917	0.943997
cisNAT+203	1.96594	0.447221	NA	NA	-0.620433	0.761086	NA	NA
cisNAT+210	-0.938122	0.534951	NA	NA	-0.203724	0.869968	-0.471437	0.843593
cisNAT+211	0.255186	0.848043	0.548392	0.81433	0.621101	0.585978	0.24249	0.930988
cisNAT+216	0.478617	0.727906	NA	NA	0.547764	0.574088	-0.243527	0.930988
cisNAT+217	-1.14299	0.530071	NA	NA	NA	NA	NA	NA
cisNAT+221	-0.0606638	0.957091	NA	NA	-0.258317	0.748145	0.2443	0.936263
cisNAT+229	-0.179749	0.886446	NA	NA	-0.348046	0.739028	-0.919883	0.631613
cisNAT+230	-0.6062	0.684743	0.448253	0.664647	-0.0920896	0.889898	-0.672694	0.228364
cisNAT+232	-0.773458	0.608811	NA	NA	-0.433809	0.651722	0.0823568	0.969563
cisNAT+234	-0.30821	0.846472	NA	NA	-0.0888838	0.918308	-0.831601	0.639007
cisNAT+239	-0.441363	0.770886	NA	NA	0.690949	0.754174	NA	NA
cisNAT+240	-0.517319	0.762442	NA	NA	NA	NA	NA	NA
cisNAT+241	-0.675994	0.733339	NA	NA	1.03932	0.619939	NA	NA
cisNAT+246	-0.671371	0.63443	NA	NA	NA	NA	NA	NA
cisNAT+248	-0.797913	0.600881	NA	NA	0.165029	0.834867	-2.07007	0.000918204
cisNAT+250	-0.488392	0.777588	NA	NA	0.0333124	0.93969	0.248649	0.877724
cisNAT+254	-0.639873	0.662213	NA	NA	0.0886056	0.904948	0.386546	0.823028
cisNAT+258	0.114239	0.929618	NA	NA	-0.775022	0.571343	NA	NA
cisNAT+26	-0.831557	0.539952	NA	NA	NA	NA	NA	NA
cisNAT+263	-0.566639	0.676227	NA	NA	-0.188287	0.892296	NA	NA
cisNAT+264	0.0530728	0.964431	NA	NA	-0.434616	0.685156	-0.641501	0.805298
cisNAT+265	-0.0920249	0.934961	NA	NA	-0.692481	0.364072	-0.157071	0.945947
cisNAT+266	0.498019	0.883428	NA	NA	NA	NA	NA	NA
cisNAT+267	-0.103601	0.924263	NA	NA	0.435785	0.569732	-0.36306	0.850939
cisNAT+273	0.377505	0.836122	NA	NA	0.471712	0.791357	NA	NA
cisNAT+276	-0.150775	0.910702	NA	NA	0.175627	0.84983	-0.261247	0.906767
cisNAT+277	0.361982	0.779201	NA	NA	-0.541288	0.557048	0.257662	0.937833
cisNAT+284	0.761624	0.69631	NA	NA	-0.424126	0.829082	NA	NA
cisNAT+286	-0.325649	0.878531	NA	NA	-0.42052	0.652673	0.048555	0.970541
cisNAT+292	-0.069593	0.952454	NA	NA	0.434676	0.636524	-0.183631	0.929667
cisNAT+293	1.08181	0.531829	NA	NA	0.662542	0.643061	-0.765363	0.809139
cisNAT+294	-0.130952	0.913854	NA	NA	-0.499628	0.554452	-0.0143176	0.98992
cisNAT+300	0.213045	0.881314	0.613775	0.620349	-0.311223	0.644089	-0.298051	0.821178
cisNAT+301	-0.678837	0.629307	NA	NA	0.0317861	0.946855	-0.77653	0.805298
cisNAT+302	-0.272527	0.850863	NA	NA	0.183145	0.809736	-0.0736451	0.961706
cisNAT+303	-0.500047	0.793491	NA	NA	1.03695	0.364072	-1.37345	0.0206062
cisNAT+304	-0.768351	0.545497	2.48742	0.0199	-0.54581	0.364072	-0.259886	0.877724
cisNAT+309	0.129265	0.934961	NA	NA	0.433892	0.663349	-0.757122	0.50764
cisNAT+315	-0.161615	0.917692	NA	NA	-0.570785	0.554452	0.446038	0.877724
cisNAT+317	0.00813404	0.947675	NA	NA	-0.852533	0.574259	NA	NA
cisNAT+320	-0.432275	0.762442	NA	NA	-0.286128	0.749477	-0.886387	0.673702
cisNAT+325	-1.33433	0.539952	NA	NA	-0.412853	0.837655	NA	NA
cisNAT+326	1.19036	0.539952	NA	NA	NA	NA	NA	NA
cisNAT+327	-0.792551	0.63273	NA	NA	0.84577	0.542157	0.701337	0.776815
cisNAT+33	-0.715713	0.584358	NA	NA	-0.937744	0.557158	-0.442832	0.863377
cisNAT+335	-0.269306	0.819753	NA	NA	-0.00527846	0.977929	-0.635711	0.777493
cisNAT+338	0.706173	0.626057	NA	NA	1.92746	0.158314	-0.587253	0.721501
cisNAT+343	-1.36869	0.530071	NA	NA	-0.514345	0.713811	NA	NA
cisNAT+347	-0.408373	0.844143	NA	NA	NA	NA	NA	NA
cisNAT+350	-0.433761	0.751831	-0.475129	0.658028	0.342452	0.789446	-1.24491	0.428092
cisNAT+351	-0.0205176	0.98413	NA	NA	0.504008	0.569732	-0.566003	0.495895
cisNAT+353	-0.000489998	0.98763	NA	NA	-0.269331	0.764916	0.517914	0.850939
cisNAT+355	0.127966	0.905926	NA	NA	-0.365704	0.748145	0.945902	0.772855
cisNAT+356	0.39372	0.785696	NA	NA	0.547072	0.549937	-0.333939	0.861434
cisNAT+358	-0.0449066	0.961232	NA	NA	0.529387	0.542157	-0.36183	0.772855
cisNAT+359	-0.501903	0.69633	NA	NA	0.181456	0.830054	-0.402985	0.835058
cisNAT+36	-0.481564	0.746221	NA	NA	-0.577513	0.547504	-2.00748	0.0626826
cisNAT+362	-0.164836	0.92559	NA	NA	-0.630111	0.676076	NA	NA
cisNAT+370	-0.63062	0.553755	1.769	0.014925	-0.867103	0.281911	-0.156475	0.94955
cisNAT+377	-0.498707	0.7783	NA	NA	NA	NA	NA	NA
cisNAT+387	-0.313519	0.842259	NA	NA	0.139522	0.881765	-0.465276	0.766119
cisNAT+391	0.70657	0.715326	NA	NA	-0.488476	0.7923	NA	NA
cisNAT+392	-0.978819	0.530071	NA	NA	NA	NA	NA	NA
cisNAT+396	-0.212704	0.875269	0.993538	0.319334	-0.333231	0.669231	-0.656076	0.483855
cisNAT+40	-1.51321	0.367117	NA	NA	NA	NA	NA	NA
cisNAT+402	-1.06426	0.635476	NA	NA	NA	NA	NA	NA
cisNAT+404	-0.149373	0.899063	NA	NA	0.24859	0.81032	-0.681133	0.821178
cisNAT+41	-0.154792	0.88964	NA	NA	-0.235574	0.780633	0.522252	0.863548
cisNAT+422	-0.696509	0.635476	NA	NA	-0.877275	0.546357	0.220529	0.928178
cisNAT+423	0.162616	0.90052	NA	NA	0.618118	0.57903	NA	NA
cisNAT+424	0.512479	0.820987	NA	NA	-0.0398277	0.946428	NA	NA
cisNAT+427	-0.661566	0.69631	NA	NA	-0.596424	0.542157	-0.232284	0.925263
cisNAT+428	-0.0270417	0.94617	NA	NA	-0.221085	0.853473	NA	NA
cisNAT+430	-0.0396386	0.972742	NA	NA	-0.0956995	0.895801	0.0672652	0.961706
cisNAT+432	0.0343807	0.978981	NA	NA	0.163058	0.902655	-0.271775	0.926939
cisNAT+433	-0.30084	0.878426	NA	NA	NA	NA	NA	NA
cisNAT+436	0.587379	0.704304	NA	NA	NA	NA	NA	NA
cisNAT+437	-0.548073	0.723623	NA	NA	0.326437	0.84957	NA	NA
cisNAT+440	-0.141664	0.917724	0.612671	0.663905	0.0153623	0.966679	0.205476	0.857638
cisNAT+441	-0.546004	0.645147	0.870959	0.519269	-0.946247	0.364072	NA	NA
cisNAT+446	-0.264255	0.847658	NA	NA	0.0895273	0.892297	0.428055	0.869981
cisNAT+448	-0.132	0.914754	NA	NA	0.050652	0.947278	-0.402344	0.876858
cisNAT+450	0.564804	0.776244	NA	NA	-0.35829	0.852499	NA	NA
cisNAT+452	0.33075	0.843302	NA	NA	NA	NA	NA	NA
cisNAT+454	-0.638437	0.635185	NA	NA	-0.201471	0.828493	-0.422195	0.835058
cisNAT+456	-1.5041	0.356966	NA	NA	-1.72513	0.492533	NA	NA
cisNAT+46	-0.178076	0.881851	NA	NA	0.322726	0.763469	0.539633	0.876858
cisNAT+460	-0.700632	0.637784	NA	NA	0.517679	0.548313	-0.861677	0.431665
cisNAT+464	-0.441775	0.742253	NA	NA	-0.12502	0.919641	0.648072	0.850939
cisNAT+470	0.582032	0.700977	NA	NA	0.300497	0.797406	NA	NA
cisNAT+48	-0.0399006	0.969442	NA	NA	-0.83929	0.364072	-0.250386	0.943997
cisNAT+481	0.128249	0.920728	NA	NA	0.559909	0.542157	-0.762796	0.417679
cisNAT+484	0.482601	0.69044	NA	NA	-0.427113	0.739854	-0.995868	0.765628
cisNAT+485	-0.0703889	0.941856	NA	NA	-0.649732	0.645204	1.44642	0.54625
cisNAT+486	0.341562	0.784532	0.935989	0.300444	-0.127258	0.849496	-0.639725	0.270126
cisNAT+487	1.12963	0.539952	NA	NA	-0.473486	0.721046	0.684508	0.825656
cisNAT+490	0.0362357	0.968109	-0.035912	0.914281	-0.0512176	0.927786	-1.13418	0.172589
cisNAT+495	0.0427005	0.961137	NA	NA	-0.530642	0.590721	-1.69204	0.259085
cisNAT+497	-0.246291	0.881932	NA	NA	1.56878	0.542157	NA	NA
cisNAT+5	0.0174113	0.98413	NA	NA	-0.160757	0.891481	0.0635128	0.970541
cisNAT+500	-0.0133486	0.986141	NA	NA	-0.0189348	0.96571	-0.719538	0.464729
cisNAT+504	0.221167	0.853267	NA	NA	0.254711	0.737043	-0.0907962	0.961706
cisNAT+505	-0.838067	0.543935	0.27307	0.869443	-0.0899673	0.891339	0.0589504	0.961706
cisNAT+510	-0.459092	0.769008	0.494026	0.585859	0.483482	0.542157	-1.52287	0.00604851
cisNAT+511	-0.0271969	0.979961	NA	NA	0.109448	0.891903	0.0355748	0.970541
cisNAT+521	-0.384681	0.810293	NA	NA	-0.680185	0.580749	NA	NA
cisNAT+524	-0.729907	0.662213	NA	NA	NA	NA	NA	NA
cisNAT+53	-0.700118	0.623547	NA	NA	0.024516	0.966679	-0.644884	0.805298
cisNAT+531	-0.624863	0.698633	0.167138	0.900741	-0.325644	0.67397	-0.843604	0.22366
cisNAT+534	-0.755577	0.694071	NA	NA	-0.772419	0.554452	NA	NA
cisNAT+537	0.202367	0.85289	NA	NA	0.528667	0.578016	-0.428572	0.823028
cisNAT+538	0.248127	0.852447	NA	NA	-0.326257	0.742439	-0.936045	0.653845
cisNAT+551	0.636273	0.757652	NA	NA	0.0342597	0.926587	NA	NA
cisNAT+552	-1.10716	0.530071	NA	NA	0.0335128	0.954561	-0.573735	0.821178
cisNAT+556	0.339832	0.829032	NA	NA	NA	NA	NA	NA
cisNAT+557	-0.0783192	0.938421	NA	NA	NA	NA	NA	NA
cisNAT+567	0.685773	0.709915	NA	NA	NA	NA	-0.368082	0.910146
cisNAT+569	1.64281	0.530071	NA	NA	1.32805	0.364072	-0.268568	0.93956
cisNAT+57	-0.687635	0.610133	NA	NA	NA	NA	NA	NA
cisNAT+570	0.439069	0.7783	NA	NA	0.133339	0.881765	-0.685882	0.806169
cisNAT+571	1.1536	0.530071	NA	NA	-0.190862	0.748145	1.21061	0.321029
cisNAT+573	-0.822188	0.639449	NA	NA	-1.23447	0.542157	NA	NA
cisNAT+583	-0.289905	0.844186	NA	NA	-0.196039	0.881355	NA	NA
cisNAT+584	-0.533917	0.704374	NA	NA	0.132588	0.885505	NA	NA
cisNAT+587	0.158649	0.911004	0.758499	0.627686	-0.0762946	0.918681	0.477414	0.626228
cisNAT+589	-0.121773	0.924894	NA	NA	0.48126	0.681261	NA	NA
cisNAT+59	-0.500422	0.816472	NA	NA	-0.388801	0.737043	-0.501285	0.876858
cisNAT+593	-0.355311	0.810354	NA	NA	0.395186	0.555952	-2.58017	9.34737e-05
cisNAT+596	0.442451	0.754645	NA	NA	-0.105806	0.908448	1.134	0.635382
cisNAT+597	-0.119045	0.928212	NA	NA	-1.18801	0.543494	NA	NA
cisNAT+598	-0.22689	0.873097	NA	NA	0.498706	0.721762	NA	NA
cisNAT+60	-0.625452	0.704979	NA	NA	NA	NA	NA	NA
cisNAT+604	-0.900411	0.700977	NA	NA	-0.33062	0.839344	NA	NA
cisNAT+605	0.0549052	0.95329	-0.752359	0.670615	-0.114076	0.881765	-0.462949	0.809167
cisNAT+606	-1.7955	0.356966	NA	NA	-0.682789	0.636675	NA	NA
cisNAT+607	0.00103356	0.996635	NA	NA	0.0471881	0.926537	-0.295245	0.841157
cisNAT+61	-0.198489	0.883428	NA	NA	-0.0616024	0.929241	-0.113139	0.93956
cisNAT+611	-0.00415406	0.995804	NA	NA	-0.418049	0.585874	-0.404598	0.821178
cisNAT+617	0.0833473	0.937434	NA	NA	0.592878	0.661359	NA	NA
cisNAT+619	0.0576572	0.964431	NA	NA	-0.860145	0.554452	NA	NA
cisNAT+620	0.316171	0.822079	0.368213	0.782554	0.388732	0.590721	-1.119	0.211085
cisNAT+621	-0.0804395	0.936084	1.23236	0.300444	-0.173003	0.78164	-2.00458	2.39789e-06
cisNAT+625	-0.427508	0.780687	NA	NA	0.386703	0.81032	NA	NA
cisNAT+626	0.15192	0.911198	NA	NA	-0.826263	0.542157	-0.566387	0.861434
cisNAT+63	0.610313	0.658312	NA	NA	0.338197	0.648239	0.245924	0.883597
cisNAT+630	0.0222288	0.98413	NA	NA	0.453286	0.743542	1.23698	0.665173
cisNAT+633	-0.409672	0.90138	NA	NA	NA	NA	NA	NA
cisNAT+634	-0.778983	0.530071	0.148651	0.840029	0.349227	0.554452	-2.51907	3.44777e-11
cisNAT+635	-0.201573	0.885202	NA	NA	0.361544	0.651722	0.815047	0.374151
cisNAT+643	0.543093	0.774927	NA	NA	NA	NA	NA	NA
cisNAT+646	-0.355982	0.766976	0.524742	0.48244	0.640024	0.364072	0.70265	0.483855
cisNAT+647	-0.380746	0.767871	NA	NA	-0.228578	0.881765	-0.641451	0.821178
cisNAT+652	0.0986099	0.923872	0.430714	0.596018	0.176867	0.799653	-0.292377	0.799505
cisNAT+658	0.21142	0.864013	NA	NA	-0.180168	0.83086	0.79427	0.638373
cisNAT+659	0.287084	0.861675	NA	NA	-0.329316	0.84983	NA	NA
cisNAT+663	0.384637	0.799668	NA	NA	-0.49217	0.645346	NA	NA
cisNAT+668	-0.775986	0.661628	NA	NA	NA	NA	NA	NA
cisNAT+669	0.333848	0.817274	NA	NA	NA	NA	NA	NA
cisNAT+670	-0.364616	0.851352	NA	NA	NA	NA	NA	NA
cisNAT+675	0.218559	0.878531	NA	NA	-0.388946	0.875376	NA	NA
cisNAT+676	-0.284046	0.861514	NA	NA	0.582329	0.645204	-0.510996	0.821178
cisNAT+678	-0.0568541	0.947878	0.159984	0.855239	-0.0911687	0.885505	-0.669875	0.344097
cisNAT+682	-0.221002	0.85289	0.610973	0.627686	-0.0563319	0.926537	-0.43146	0.821178
cisNAT+690	-0.165809	0.899063	NA	NA	-0.0927538	0.89023	0.200519	0.876858
cisNAT+691	0.222039	0.846186	NA	NA	0.74439	0.542157	-0.726756	0.626228
cisNAT+692	0.00965394	0.983891	NA	NA	-0.0827402	0.911183	-0.475151	0.876858
cisNAT+696	-0.363649	0.808441	NA	NA	NA	NA	NA	NA
cisNAT+7	0.0239939	0.981306	NA	NA	-0.686747	0.542157	1.40011	0.203971
cisNAT+700	0.50542	0.739692	NA	NA	0.210619	0.832886	NA	NA
cisNAT+701	-0.346391	0.857421	NA	NA	-0.00188758	0.946428	NA	NA
cisNAT+705	-0.416355	0.771735	NA	NA	1.39969	0.471977	-2.69277	0.0626826
cisNAT+712	0.860686	0.569377	-0.0266184	0.941627	0.485924	0.542157	-0.211281	0.864192
cisNAT+715	0.602656	0.718296	NA	NA	0.0831984	0.902655	0.0500251	0.968364
cisNAT+718	-0.166741	0.89773	0.736673	0.594805	-0.236067	0.749592	0.0932405	0.960405
cisNAT+72	-0.289121	0.815477	NA	NA	-0.267841	0.675501	0.159939	0.876858
cisNAT+723	-0.951817	0.539952	NA	NA	-0.026946	0.956014	-0.166692	0.961706
cisNAT+727	-0.0204935	0.979961	0.222821	0.700025	0.0617388	0.912978	0.0327434	0.961706
cisNAT+734	-0.00323111	0.961232	NA	NA	-0.162257	0.889898	NA	NA
cisNAT+74	0.175219	0.88964	NA	NA	0.0556554	0.9487	-0.140402	0.961706
cisNAT+751	0.00177392	0.986577	NA	NA	0.132205	0.865101	-0.615157	0.799505
cisNAT+752	-0.226192	0.839477	NA	NA	0.110166	0.904476	-0.0908444	0.961706
cisNAT+754	-0.162831	0.89679	NA	NA	-0.312047	0.84983	NA	NA
cisNAT+758	-0.836425	0.692754	NA	NA	0.370937	0.81032	NA	NA
cisNAT+768	-0.260176	0.871509	NA	NA	NA	NA	NA	NA
cisNAT+772	-0.156045	0.875269	-0.200893	0.808598	0.407731	0.554452	0.0813398	0.94955
cisNAT+774	0.00556883	0.971028	NA	NA	NA	NA	NA	NA
cisNAT+776	-0.318129	0.834603	NA	NA	0.636459	0.636524	0.302698	0.934516
cisNAT+781	0.900293	0.69217	NA	NA	-0.083835	0.938064	NA	NA
cisNAT+783	0.489877	0.740098	NA	NA	-0.428002	0.699297	NA	NA
cisNAT+785	-1.75625	0.356966	NA	NA	0.320377	0.838933	NA	NA
cisNAT+788	-0.891621	0.63443	NA	NA	NA	NA	NA	NA
cisNAT+789	0.439015	0.77534	NA	NA	-0.543876	0.750569	0.297172	0.883597
cisNAT+790	0.139686	0.937434	NA	NA	NA	NA	NA	NA
cisNAT+791	0.0843474	0.936636	NA	NA	NA	NA	NA	NA
cisNAT+799	-0.886697	0.539952	NA	NA	-0.185419	0.889194	-0.25876	0.93956
cisNAT+8	0.564293	0.689306	NA	NA	-0.392363	0.838695	-0.966313	0.727241
cisNAT+800	0.536704	0.742253	NA	NA	-0.666197	0.641979	NA	NA
cisNAT+801	-0.514116	0.770886	NA	NA	0.95872	0.554452	NA	NA
cisNAT+804	-0.165378	0.896301	0.852148	0.480314	0.446623	0.554452	-0.675998	0.428092
cisNAT+811	-1.02612	0.554906	NA	NA	NA	NA	NA	NA
cisNAT+812	-0.888046	0.560923	NA	NA	0.056111	0.938103	-1.13258	0.523829
cisNAT+813	0.209908	0.878558	NA	NA	0.335251	0.762162	-0.608596	0.821178
cisNAT+815	0.37516	0.839477	NA	NA	NA	NA	NA	NA
cisNAT+823	-0.589169	0.712013	NA	NA	0.15916	0.84983	-0.176599	0.934516
cisNAT+824	-0.568305	0.74471	NA	NA	NA	NA	NA	NA
cisNAT+827	-0.650039	0.657665	-0.251035	0.737263	0.0449551	0.930275	-0.29213	0.765628
cisNAT+829	-0.652995	0.7509	NA	NA	-0.865771	0.645807	NA	NA
cisNAT+837	-0.101234	0.929607	NA	NA	0.524686	0.553643	-0.312619	0.876858
cisNAT+838	-0.936502	0.711621	NA	NA	NA	NA	NA	NA
cisNAT+839	-0.281504	0.886478	NA	NA	-0.134165	0.894024	0.328845	0.886003
cisNAT+840	-0.429686	0.777123	1.57127	0.313921	-0.0860154	0.890578	-0.67435	0.392571
cisNAT+842	0.456745	0.810354	NA	NA	NA	NA	NA	NA
cisNAT+844	0.760865	0.635476	NA	NA	0.319941	0.704134	-0.775724	0.628919
cisNAT+849	1.70915	0.530071	NA	NA	0.968313	0.549937	NA	NA
cisNAT+852	-0.87047	0.556885	0.204467	0.842001	-0.253532	0.723305	-1.62383	0.00726163
cisNAT+853	0.115011	0.943349	NA	NA	-0.0649776	0.927837	-0.0260379	0.987816
cisNAT+863	-0.709042	0.622508	NA	NA	1.4067	0.517219	-0.808393	0.809167
cisNAT+869	-0.418219	0.758717	NA	NA	-0.312622	0.763955	-0.189257	0.95506
cisNAT+87	0.41608	0.792749	NA	NA	0.724963	0.470575	1.02655	0.201304
cisNAT+872	-0.526185	0.702668	NA	NA	0.331196	0.706286	-0.0637143	0.968364
cisNAT+873	-1.619	0.539952	NA	NA	-0.337017	0.763955	NA	NA
cisNAT+879	-0.400821	0.784532	NA	NA	-0.213365	0.84957	-1.21858	0.564236
cisNAT+88	0.789845	0.603004	NA	NA	-0.247414	0.796885	NA	NA
cisNAT+880	0.164701	0.873595	NA	NA	0.853998	0.554452	-0.532448	0.863377
cisNAT+881	0.592276	0.709915	NA	NA	NA	NA	NA	NA
cisNAT+885	0.124185	0.909441	0.73832	0.188817	0.256649	0.686957	-0.363213	0.564236
cisNAT+886	0.315258	0.798352	0.98279	0.188817	0.169607	0.792764	0.00916638	0.985392
cisNAT+889	-1.54409	0.530071	NA	NA	NA	NA	NA	NA
cisNAT+891	0.0310882	0.96102	NA	NA	NA	NA	NA	NA
cisNAT+895	0.235734	0.86002	NA	NA	-0.557629	0.670976	NA	NA
cisNAT+903	0.540082	0.720911	NA	NA	NA	NA	NA	NA
cisNAT+904	0.377683	0.819753	NA	NA	-0.118148	0.908524	-0.778053	0.785895
cisNAT+908	-0.933556	0.571266	NA	NA	0.704073	0.642128	-0.500085	0.876858
cisNAT+91	0.138898	0.912288	NA	NA	0.594941	0.697101	NA	NA
cisNAT+911	0.628459	0.694336	0.692639	0.630782	0.662369	0.418233	-0.592885	0.517772
cisNAT+912	1.78919	0.404161	NA	NA	NA	NA	NA	NA
cisNAT+918	0.0256593	0.966488	NA	NA	-0.488215	0.554452	NA	NA
cisNAT+92	0.293968	0.889127	NA	NA	NA	NA	NA	NA
cisNAT+922	-0.60037	0.650161	NA	NA	-0.626736	0.542157	0.0683701	0.970484
cisNAT+926	1.08853	0.539952	NA	NA	-0.211883	0.912978	NA	NA
cisNAT+929	-0.166236	0.897116	NA	NA	-0.283751	0.723305	-0.68697	0.602823
cisNAT+93	-1.92757	0.356966	NA	NA	-0.25229	0.840956	NA	NA
cisNAT+932	0.299581	0.830578	NA	NA	-0.18363	0.885505	-0.641215	0.821178
cisNAT+936	0.777544	0.620091	NA	NA	0.611706	0.554452	0.902621	0.392571
cisNAT+939	0.00977944	0.992471	NA	NA	0.596507	0.548644	0.115482	0.95506
cisNAT+941	-0.180619	0.895051	NA	NA	0.0518179	0.929497	-0.350641	0.777493
cisNAT+942	0.195556	0.911245	NA	NA	NA	NA	NA	NA
cisNAT+944	0.11804	0.924263	NA	NA	NA	NA	-1.18753	0.431159
cisNAT+947	-0.655953	0.793419	NA	NA	-0.207565	0.915247	NA	NA
cisNAT+948	-0.105003	0.924346	NA	NA	-0.205026	0.804016	-1.13696	0.392571
cisNAT+949	0.236488	0.830409	NA	NA	0.220124	0.81032	-1.1813	0.413341
cisNAT+95	0.307402	0.817274	NA	NA	-0.291791	0.762248	-0.221164	0.915148
cisNAT+952	-0.235146	0.856259	NA	NA	-0.49018	0.620403	0.306591	0.906767
cisNAT+954	-0.206067	0.883428	NA	NA	-0.263847	0.879278	NA	NA
cisNAT+958	0.267073	0.839477	0.599549	0.573664	0.453615	0.554452	0.0160995	0.986172
cisNAT+961	0.458819	0.77534	NA	NA	-0.0041642	0.980115	0.47925	0.799505
cisNAT+962	0.427423	0.748152	NA	NA	0.174889	0.855645	0.017017	0.989571
cisNAT+964	0.147338	0.914851	NA	NA	-0.0167791	0.954561	-0.508075	0.876858
cisNAT+965	0.396411	0.779223	NA	NA	NA	NA	NA	NA
cisNAT+967	-0.177767	0.891981	NA	NA	0.224966	0.776847	-0.281412	0.861434
cisNAT+969	-2.2543	0.356966	NA	NA	-0.842864	0.396987	NA	NA
cisNAT+971	-0.0637952	0.943427	NA	NA	-0.146277	0.902655	-1.07925	0.483855
cisNAT+972	0.0596527	0.952454	NA	NA	0.284935	0.729607	-0.636134	0.809167
cisNAT+977	-0.508892	0.77749	NA	NA	0.340753	0.662924	-1.66502	0.00856302
cisNAT+979	-1.01381	0.540182	-0.101769	0.919858	0.36893	0.631779	-2.30823	0.000165265
cisNAT+983	0.899699	0.752828	NA	NA	-0.0533031	0.959364	NA	NA
cisNAT+987	-0.616779	0.658716	NA	NA	NA	NA	-0.92381	0.765628
cisNAT+988	-0.451267	0.74049	NA	NA	-0.346014	0.739854	-0.53882	0.694892
cisNAT+997	0.0381843	0.966712	NA	NA	0.0849297	0.902655	-0.424703	0.821178
Downstream_koi	0.507549	0.625646	1.56532	0.139922	1.24506	0.364072	-0.214506	0.876858
FBti0018862-	-0.340093	0.833172	NA	NA	-0.104058	0.89023	0.117056	0.937833
FBti0018862+	0.000914984	0.99695	NA	NA	-0.0858411	0.896719	-0.0866129	0.943997
FBti0018865-	0.365772	0.74049	NA	NA	0.717269	0.590721	NA	NA
FBti0018866-	1.39487	0.530071	NA	NA	-0.292173	0.881765	0.446967	0.863548
FBti0018866+	0.895249	0.530071	NA	NA	NA	NA	0.393701	0.910146
FBti0018887+	0.427083	0.837333	NA	NA	NA	NA	NA	NA
FBti0018894+	-0.307033	0.798352	NA	NA	NA	NA	NA	NA
FBti0018927+	0.259192	0.817396	NA	NA	0.981405	0.381551	-0.202833	0.943997
FBti0018966+	-0.23393	0.876598	NA	NA	0.139592	0.893051	NA	NA
FBti0018985-	0.188145	0.847616	NA	NA	1.25374	0.364072	NA	NA
FBti0018986-	0.401513	0.700977	NA	NA	0.398271	0.549856	1.03885	0.353518
FBti0018986+	-0.944672	0.836998	NA	NA	-0.388946	0.885505	NA	NA
FBti0019000-	-0.0827809	0.946247	NA	NA	NA	NA	NA	NA
FBti0019001-	-1.44374	0.356966	NA	NA	NA	NA	NA	NA
FBti0019005-	-0.824526	0.530071	NA	NA	0.687379	0.554452	-0.84867	0.679174
FBti0019008+	0.347241	0.765086	NA	NA	-0.983031	0.643061	NA	NA
FBti0019064+	-0.379437	0.830578	NA	NA	-0.531448	0.711079	NA	NA
FBti0019078+	-0.0256707	0.979201	NA	NA	NA	NA	NA	NA
FBti0019082+	0.395364	0.80221	NA	NA	NA	NA	-0.322474	0.934516
FBti0019096-	-1.39637	0.514083	NA	NA	0.589454	0.675501	NA	NA
FBti0019096+	-0.379856	0.819036	NA	NA	-0.766661	0.670693	NA	NA
FBti0019100+	0.457765	0.742253	NA	NA	NA	NA	NA	NA
FBti0019102-	0.14175	0.909407	NA	NA	NA	NA	NA	NA
FBti0019110-	0.0416057	0.94617	NA	NA	-0.255452	0.885505	NA	NA
FBti0019120-	0.400952	0.82185	NA	NA	NA	NA	-0.053887	0.974776
FBti0019122+	1.0399	0.367117	NA	NA	0.11453	0.864565	0.870418	0.507435
FBti0019152-	-0.312561	0.857421	NA	NA	-0.164436	0.849496	2.16626	0.0935437
FBti0019179-	-0.10605	0.929607	NA	NA	0.844743	0.553643	NA	NA
FBti0019184+	-0.64008	0.642659	NA	NA	NA	NA	NA	NA
FBti0019193+	0.329707	0.88964	NA	NA	NA	NA	NA	NA
FBti0019201+	0.306081	0.833933	NA	NA	NA	NA	NA	NA
FBti0019210-	-1.42902	0.356966	NA	NA	NA	NA	NA	NA
FBti0019210+	-0.661579	0.826548	NA	NA	NA	NA	NA	NA
FBti0019214-	0.210007	0.879319	NA	NA	1.80376	0.364072	NA	NA
FBti0019214+	0.859336	0.556046	NA	NA	0.716784	0.554452	NA	NA
FBti0019220-	0.733658	0.872949	NA	NA	1.13519	0.642128	0.653402	0.797407
FBti0019220+	0.364261	0.724375	0.57535	0.342253	0.168901	0.749122	0.323858	0.686951
FBti0019235-	0.450236	0.732621	NA	NA	NA	NA	NA	NA
FBti0019242-	-0.170865	0.912939	NA	NA	-0.223804	0.819463	NA	NA
FBti0019242+	0.503566	0.720911	NA	NA	NA	NA	1.77892	0.413341
FBti0019245-	-1.0346	0.530071	NA	NA	NA	NA	NA	NA
FBti0019245+	-0.75454	0.636076	NA	NA	-1.00625	0.642128	NA	NA
FBti0019270+	-0.354721	0.790955	NA	NA	NA	NA	NA	NA
FBti0019291-	0.0366525	0.944685	NA	NA	NA	NA	NA	NA
FBti0019333+	-0.798331	0.539952	NA	NA	NA	NA	NA	NA
FBti0019347-	-1.77958	0.575988	NA	NA	NA	NA	NA	NA
FBti0019349-	1.11585	0.530071	NA	NA	-0.433238	0.76811	0.673797	0.821178
FBti0019349+	-0.340976	0.84696	NA	NA	NA	NA	NA	NA
FBti0019359+	0.642871	0.658716	NA	NA	NA	NA	NA	NA
FBti0019381-	0.619041	0.632783	0.734565	0.370649	-0.215958	0.712392	0.251487	0.809167
FBti0019381+	0.425681	0.833172	0.991772	0.441139	-0.109615	0.892484	-0.822094	0.216291
FBti0019384-	0.523437	0.646597	0.70532	0.188817	0.29594	0.573663	-0.602879	0.223002
FBti0019384+	0.0531345	0.966488	NA	NA	0.742854	0.554452	-0.394606	0.635382
FBti0019391-	-0.0971688	0.947675	NA	NA	NA	NA	NA	NA
FBti0019405+	-0.190744	0.873038	NA	NA	NA	NA	NA	NA
FBti0019425-	-1.56889	0.539952	NA	NA	-0.815228	0.619495	0.452121	0.883597
FBti0019425+	-0.899409	0.539952	NA	NA	NA	NA	0.213467	0.943997
FBti0019430-	-0.172568	0.85289	NA	NA	-1.42185	0.364072	-0.875031	0.788195
FBti0019445-	1.20925	0.635033	NA	NA	NA	NA	NA	NA
FBti0019445+	0.376125	0.817644	NA	NA	NA	NA	NA	NA
FBti0019450+	1.26692	0.356966	0.891356	0.188817	0.202971	0.697101	-0.479852	0.223002
FBti0019464+	0.203911	0.871596	NA	NA	NA	NA	NA	NA
FBti0019465-	-0.35231	0.809017	NA	NA	0.198062	0.881765	0.462893	0.883775
FBti0019465+	-0.018226	0.98537	NA	NA	0.559149	0.794704	NA	NA
FBti0019471+	0.506067	0.79462	NA	NA	NA	NA	NA	NA
FBti0019492-	0.269071	0.871004	0.534716	0.188817	-0.846272	0.652758	0.218043	0.910701
FBti0019492+	1.91628	0.447221	NA	NA	NA	NA	NA	NA
FBti0019498-	0.636273	0.843413	NA	NA	NA	NA	NA	NA
FBti0019525-	1.64493	0.546883	NA	NA	NA	NA	NA	NA
FBti0019525+	1.48823	0.356966	NA	NA	0.00699308	0.947172	1.25768	0.483855
FBti0019548-	-1.58895	0.493636	NA	NA	NA	NA	NA	NA
FBti0019548+	0.374258	0.833332	NA	NA	NA	NA	NA	NA
FBti0019611+	-0.56772	0.608811	1.18725	0.301419	0.180756	0.749122	-1.38072	1.1122e-05
FBti0019612-	1.14413	0.483997	0.238104	0.795028	0.403416	0.554452	1.03359	0.193098
FBti0019623+	0.308871	0.830578	NA	NA	NA	NA	NA	NA
FBti0019625-	0.318453	0.826968	NA	NA	0.461827	0.669231	0.381076	0.876858
FBti0019625+	0.752015	0.624748	NA	NA	0.584219	0.615597	1.09642	0.556373
FBti0019649-	-0.924415	0.617448	NA	NA	-0.189311	0.8924	NA	NA
FBti0019649+	-0.201584	0.866596	NA	NA	NA	NA	NA	NA
FBti0019655-	-1.59975	0.499537	-0.858793	0.491965	-0.416384	0.685563	NA	NA
FBti0019679-	1.22044	0.530071	NA	NA	NA	NA	NA	NA
FBti0019698-	0.45187	0.77534	NA	NA	0.288153	0.655929	0.208933	0.850939
FBti0019698+	0.587077	0.727137	NA	NA	0.492901	0.554452	0.266407	0.821178
FBti0019722-	0.723937	0.69183	NA	NA	NA	NA	NA	NA
FBti0019734-	-0.273112	0.873038	NA	NA	NA	NA	NA	NA
FBti0019734+	0.398402	0.768726	NA	NA	-0.178922	0.81032	1.17002	0.301575
FBti0019738+	-1.29574	0.530071	NA	NA	-0.713192	0.739028	NA	NA
FBti0019740-	0.329707	0.836014	NA	NA	0.0502934	0.929497	NA	NA
FBti0019744-	0.0686799	0.947903	NA	NA	0.590522	0.762248	NA	NA
FBti0019744+	0.254596	0.869955	NA	NA	0.679699	0.554452	NA	NA
FBti0019745+	0.348009	0.852447	NA	NA	NA	NA	NA	NA
FBti0019749-	0.236507	0.878531	NA	NA	NA	NA	NA	NA
FBti0019754-	1.61765	0.530071	NA	NA	NA	NA	NA	NA
FBti0019758+	1.22763	0.356966	NA	NA	-0.739828	0.46651	1.09763	0.217882
FBti0019762+	0.528622	0.81175	NA	NA	NA	NA	NA	NA
FBti0019845-	-1.18111	0.356966	-0.936123	0.0767571	-3.50198	0.0615667	NA	NA
FBti0019846-	0.765035	0.615747	NA	NA	0.60754	0.762248	NA	NA
FBti0019940-	0.474776	0.794692	NA	NA	-0.673345	0.605603	1.13308	0.635382
FBti0019940+	-0.478906	0.692134	NA	NA	0.309846	0.791357	0.502342	0.863377
FBti0019975-	0.383017	0.743228	NA	NA	NA	NA	-1.11848	0.713049
FBti0019977+	0.377043	0.753122	NA	NA	0.547374	0.606618	NA	NA
FBti0019996-	0.116923	0.919228	NA	NA	0.389154	0.885243	NA	NA
FBti0019996+	-0.728336	0.709678	NA	NA	NA	NA	NA	NA
FBti0020008+	1.58745	0.356966	NA	NA	0.0573413	0.923342	1.76618	0.0372597
FBti0020019+	-0.148498	0.923869	NA	NA	NA	NA	NA	NA
FBti0020048-	1.02582	0.531442	NA	NA	NA	NA	NA	NA
FBti0020086+	0.175742	0.852447	0.556349	0.519618	0.746136	0.364072	-0.0748431	0.961706
FBti0020092-	0.542275	0.719263	NA	NA	0.196214	0.79341	0.53502	0.686951
FBti0020092+	0.0812673	0.945838	NA	NA	0.483079	0.651722	1.27192	0.303531
FBti0020126-	-0.778568	0.780129	NA	NA	NA	NA	NA	NA
FBti0020126+	0.97735	0.530071	NA	NA	1.04486	0.364072	2.63059	0.0372597
FBti0020127+	0.114694	0.913177	NA	NA	1.03411	0.670976	-1.02088	0.772855
FBti0020158+	0.0985077	0.934961	NA	NA	-0.0614827	0.946428	NA	NA
FBti0020173-	1.39564	0.356966	NA	NA	0.514384	0.723305	-0.442467	0.864117
FBti0020203-	-0.265388	0.922341	NA	NA	NA	NA	NA	NA
FBti0020203+	1.24388	0.356966	1.73623	0.21075	1.31139	0.09235	0.564233	0.635382
FBti0020205+	-0.224612	0.857421	NA	NA	-0.210411	0.864565	NA	NA
FBti0020216+	0.0975071	0.937434	NA	NA	0.316885	0.853473	NA	NA
FBti0020219-	-0.545008	0.800977	NA	NA	NA	NA	NA	NA
FBti0020227-	-1.46293	0.530071	NA	NA	-0.585741	0.815452	NA	NA
FBti0020227+	-0.688326	0.608811	NA	NA	NA	NA	NA	NA
FBti0020230-	1.35894	0.356966	NA	NA	1.07146	0.364072	1.2914	0.523829
FBti0020233+	-0.094089	0.914754	NA	NA	NA	NA	NA	NA
FBti0020255-	0.210357	0.843118	NA	NA	-0.222086	0.889898	NA	NA
FBti0020259-	0.0411279	0.973014	NA	NA	NA	NA	0.198836	0.95506
FBti0020269-	-0.328324	0.817094	NA	NA	0.893456	0.638487	NA	NA
FBti0020321-	0.819197	0.595275	NA	NA	NA	NA	NA	NA
FBti0020321+	-0.731459	0.701276	NA	NA	-0.200478	0.881765	NA	NA
FBti0020416+	-1.93863	0.530071	NA	NA	NA	NA	NA	NA
FBti0020420+	0.611145	0.539952	NA	NA	0.928972	0.513818	-0.00228179	0.998381
FBti0020425-	0.51027	0.74049	NA	NA	NA	NA	0.515182	0.876858
FBti0020425+	0.0842782	0.939458	NA	NA	NA	NA	NA	NA
FBti0059648-	0.760579	0.612821	2.24496	0.188817	-0.0343909	0.946855	1.22397	0.130456
FBti0059648+	0.38386	0.831878	0.340081	0.79955	0.056945	0.934681	1.28193	0.216384
FBti0059662-	-0.484279	0.83005	NA	NA	NA	NA	NA	NA
FBti0059666+	-0.379491	0.85289	NA	NA	NA	NA	NA	NA
FBti0059684+	-0.62047	0.676599	NA	NA	NA	NA	NA	NA
FBti0059739+	0.308659	0.84728	NA	NA	NA	NA	-0.814285	0.821178
FBti0059782+	1.51171	0.356966	NA	NA	0.264231	0.762635	1.07247	0.263821
FBti0059809+	0.995689	0.612747	NA	NA	1.6337	0.422546	1.25784	0.626228
FBti0059878+	-2.13949	0.356966	NA	NA	NA	NA	NA	NA
FBti0059952+	0.751297	0.693621	NA	NA	NA	NA	NA	NA
FBti0059980+	-0.943075	0.534951	NA	NA	0.301683	0.881765	NA	NA
FBti0060174-	1.82132	0.356966	NA	NA	1.47227	0.35093	0.0540613	0.968364
FBti0060174+	-0.723094	0.848512	NA	NA	1.03747	0.631779	NA	NA
FBti0060175+	1.83508	0.239822	2.61951	0.188817	2.30551	0.364072	0.3006	0.877724
FBti0060280-	0.921364	0.554906	0.693691	0.188817	0.691888	0.405603	-0.159362	0.835058
FBti0060280+	0.780959	0.530071	0.657874	0.188817	0.503951	0.542157	0.154761	0.84036
FBti0060390-	1.35544	0.530071	1.42294	0.279704	0.719299	0.542157	-0.651945	0.483855
FBti0060390+	0.901674	0.530071	1.16297	0.327473	0.400538	0.592632	0.346907	0.777493
FBti0060396-	0.526491	0.700977	NA	NA	NA	NA	NA	NA
FBti0060415-	1.08319	0.657665	NA	NA	NA	NA	NA	NA
FBti0060428-	1.25839	0.530071	NA	NA	0.425507	0.74805	0.573152	0.829325
FBti0060428+	0.352563	0.873097	NA	NA	NA	NA	NA	NA
FBti0060472-	-0.278958	0.836014	NA	NA	NA	NA	NA	NA
FBti0060511-	-1.14228	0.455618	NA	NA	0.229929	0.881765	-0.523732	0.876858
FBti0060557+	0.936725	0.700977	NA	NA	NA	NA	NA	NA
FBti0060575-	-0.629477	0.734922	NA	NA	NA	NA	NA	NA
FBti0060577-	-1.42326	0.539952	NA	NA	NA	NA	NA	NA
FBti0060577+	-0.582371	0.67081	NA	NA	-0.123074	0.931813	NA	NA
FBti0060634+	1.36964	0.414809	NA	NA	NA	NA	0.590207	0.857638
FBti0060664-	0.39135	0.782499	NA	NA	NA	NA	NA	NA
FBti0060885-	0.379324	0.866179	NA	NA	0.123054	0.885505	1.217	0.487029
FBti0060885+	0.588515	0.6496	NA	NA	-0.781955	0.549937	0.389057	0.864117
FBti0060907-	-0.480663	0.749694	NA	NA	NA	NA	NA	NA
FBti0060920-	0.690091	0.73865	NA	NA	-0.078098	0.950723	NA	NA
FBti0060977+	0.174794	0.866179	NA	NA	-0.455261	0.806097	-0.361124	0.863548
FBti0060982-	0.925885	0.646597	NA	NA	NA	NA	NA	NA
FBti0061038-	-1.62915	0.356966	NA	NA	-0.292157	0.885505	NA	NA
FBti0061038+	-1.00887	0.712013	NA	NA	1.1665	0.671071	NA	NA
FBti0061048-	-0.51586	0.800977	NA	NA	NA	NA	NA	NA
FBti0061315-	0.878505	0.684743	NA	NA	-0.362312	0.874104	1.66703	0.467927
FBti0061315+	0.789619	0.539952	NA	NA	-0.112568	0.907809	1.45596	0.313825
FBti0061329-	-0.0603348	0.947577	0.109802	0.929741	0.551457	0.542157	0.177922	0.928178
FBti0061329+	0.74769	0.819753	NA	NA	-0.245246	0.912978	NA	NA
FBti0061405-	-1.56804	0.356966	NA	NA	NA	NA	NA	NA
FBti0061437-	-0.373446	0.819753	-0.869393	0.544318	NA	NA	NA	NA
FBti0061462-	-0.763615	0.539952	NA	NA	NA	NA	NA	NA
FBti0061468+	-0.155734	0.923872	NA	NA	NA	NA	NA	NA
FBti0061485-	0.0138713	0.972218	NA	NA	2.02864	0.493845	NA	NA
FBti0061512-	-0.662839	0.726165	NA	NA	NA	NA	NA	NA
FBti0061553+	-0.706032	0.717223	NA	NA	NA	NA	NA	NA
FBti0061636+	1.1	0.590986	NA	NA	-0.550855	0.761463	NA	NA
FBti0061658+	0.338356	0.84696	NA	NA	NA	NA	NA	NA
FBti0061671-	-0.904503	0.530071	NA	NA	NA	NA	NA	NA
FBti0061698+	-0.373822	0.839933	NA	NA	NA	NA	NA	NA
FBti0061720-	-0.37501	0.880385	NA	NA	NA	NA	NA	NA
FBti0061734+	1.31413	0.356966	NA	NA	-0.731413	0.651722	1.55954	0.350888
FBti0061760+	-0.163191	0.877143	-0.306115	0.740261	NA	NA	NA	NA
FBti0061807-	0.757514	0.615747	NA	NA	0.598344	0.745602	NA	NA
FBti0061808-	2.09517	0.503689	NA	NA	NA	NA	NA	NA
FBti0061810-	0.019846	0.964431	NA	NA	NA	NA	NA	NA
FBti0061872-	0.338489	0.88832	NA	NA	NA	NA	NA	NA
FBti0061888-	1.54368	0.704374	NA	NA	NA	NA	NA	NA
FBti0061895+	0.914399	0.530071	NA	NA	0.861374	0.659566	0.84598	0.806169
FBti0061898+	1.04117	0.530071	NA	NA	0.295491	0.843745	NA	NA
FBti0061963-	-0.0917343	0.943787	NA	NA	NA	NA	0.126741	0.961706
FBti0061963+	-0.45589	0.719568	NA	NA	0.365372	0.74805	1.57331	0.306464
FBti0062003+	-0.173774	0.865132	NA	NA	NA	NA	NA	NA
FBti0062100-	-0.800602	0.572091	NA	NA	-0.665538	0.590721	NA	NA
FBti0062100+	-0.298632	0.860411	NA	NA	0.581235	0.643061	NA	NA
FBti0062103-	0.625972	0.680514	-0.196828	0.863241	0.0978455	0.895801	0.890161	0.237903
FBti0062103+	0.340444	0.825015	NA	NA	0.200754	0.806672	0.731966	0.413341
FBti0062231-	3.18751	0.356966	NA	NA	0.823062	0.516509	-0.946489	0.767471
FBti0062247-	-0.521513	0.69044	NA	NA	NA	NA	NA	NA
FBti0062317+	0.92008	0.530071	NA	NA	NA	NA	NA	NA
FBti0062440-	0.133801	0.891376	NA	NA	-0.610249	0.737043	NA	NA
FBti0062442+	0.338489	0.872949	NA	NA	NA	NA	NA	NA
FBti0062697+	0.581915	0.768323	NA	NA	NA	NA	NA	NA
FBti0062804-	1.74865	0.530071	NA	NA	NA	NA	NA	NA
FBti0063052+	-0.289061	0.873595	NA	NA	NA	NA	NA	NA
FBti0063126+	-0.685189	0.688225	NA	NA	NA	NA	NA	NA
FBti0063187-	0.196407	0.850481	NA	NA	-0.468185	0.761205	0.906731	0.809167
FBti0063189-	-1.10486	0.530071	NA	NA	NA	NA	NA	NA
FBti0063209+	-0.499502	0.77282	NA	NA	NA	NA	NA	NA
FBti0063211-	-0.619027	0.673275	NA	NA	-0.232801	0.875854	-0.715884	0.800447
FBti0063211+	-0.0459167	0.957488	NA	NA	-0.372851	0.748145	0.154652	0.94955
FBti0063215+	-0.794273	0.71357	NA	NA	NA	NA	NA	NA
FBti0063243+	0.636395	0.630915	NA	NA	NA	NA	NA	NA
FBti0063275-	-0.409421	0.746221	NA	NA	NA	NA	NA	NA
FBti0063331-	1.3031	0.530071	NA	NA	NA	NA	NA	NA
FBti0063331+	0.832051	0.694942	NA	NA	NA	NA	NA	NA
FBti0063369+	0.291212	0.878599	NA	NA	NA	NA	NA	NA
FBti0063427-	0.734701	0.709915	NA	NA	NA	NA	NA	NA
FBti0063427+	-0.103754	0.929618	NA	NA	NA	NA	NA	NA
FBti0063443-	1.14886	0.539952	NA	NA	0.147015	0.885505	NA	NA
FBti0063443+	0.659209	0.684743	NA	NA	0.167178	0.911427	NA	NA
FBti0063527+	1.65141	0.458033	NA	NA	NA	NA	NA	NA
FBti0063679-	-0.462871	0.826548	NA	NA	NA	NA	NA	NA
FBti0063679+	0.606841	0.648296	NA	NA	NA	NA	NA	NA
FBti0063683+	0.624407	0.539952	NA	NA	-0.457797	0.619398	-0.42519	0.850295
FBti0063728+	-0.197905	0.869438	NA	NA	NA	NA	NA	NA
FBti0063740-	0.034763	0.957488	NA	NA	NA	NA	NA	NA
FBti0063740+	-0.129672	0.914719	NA	NA	NA	NA	NA	NA
FBti0064037-	-1.10818	0.540182	NA	NA	NA	NA	NA	NA
FBti0064062-	1.1515	0.530071	NA	NA	1.21562	0.542157	NA	NA
FBti0064176+	-0.72999	0.632674	NA	NA	NA	NA	NA	NA
FBti0064184-	-0.950605	0.539952	-0.73631	0.586987	-0.429246	0.554452	-0.920404	0.035983
FBti0064184+	-0.949429	0.540182	0.288415	0.760763	-0.307704	0.659899	-1.01542	0.0352488
FBti0064187-	-1.17859	0.539952	NA	NA	NA	NA	NA	NA
FBti0064236-	2.06758	0.367117	NA	NA	0.610627	0.542157	1.08048	0.413341
FBti0064236+	1.85058	0.356966	1.45598	0.370649	0.445369	0.573663	NA	NA
FBti0148143-	0.455651	0.873097	NA	NA	NA	NA	-0.288265	0.929667
overlap-1	-0.831122	0.530071	NA	NA	0.505797	0.785933	NA	NA
overlap-119	-0.082495	0.949355	NA	NA	NA	NA	NA	NA
overlap-122	0.410685	0.766998	NA	NA	NA	NA	1.12959	0.517772
overlap-126	0.574249	0.79244	NA	NA	NA	NA	NA	NA
overlap-140	0.743829	0.632783	NA	NA	NA	NA	NA	NA
overlap-142	-0.433912	0.728944	NA	NA	NA	NA	NA	NA
overlap-144	0.22576	0.816472	NA	NA	0.0551097	0.947278	1.28219	0.417679
overlap-147	-1.60267	0.356966	NA	NA	NA	NA	NA	NA
overlap-149	0.359023	0.824534	NA	NA	-0.649173	0.618641	NA	NA
overlap-152	0.692659	0.682509	NA	NA	NA	NA	NA	NA
overlap-157	-0.224453	0.824237	NA	NA	NA	NA	0.0593202	0.970541
overlap-166	-0.924826	0.633353	NA	NA	NA	NA	NA	NA
overlap-175	0.432437	0.751016	NA	NA	NA	NA	NA	NA
overlap-192	0.103991	0.92559	1.23304	0.325597	-0.172814	0.815452	-0.865264	0.483855
overlap-194	3.05348	0.0224833	4.47364	0.0199	1.74112	0.0615667	1.11425	0.251939
overlap-199	-0.147866	0.934596	NA	NA	NA	NA	NA	NA
overlap-2	0.200175	0.876081	NA	NA	0.0361385	0.947172	0.216073	0.877724
overlap-200	-0.00683941	0.993104	NA	NA	-0.801062	0.364072	0.398113	0.836934
overlap-205	-0.637642	0.791309	NA	NA	NA	NA	NA	NA
overlap-209	-1.19118	0.530071	NA	NA	NA	NA	NA	NA
overlap-210	0.831473	0.652127	NA	NA	NA	NA	NA	NA
overlap-3	0.18895	0.773395	1.28623	0.0597	0.569133	0.364072	-0.450119	0.374151
overlap-31	0.764705	0.539952	0.356174	0.339666	0.180994	0.747286	1.25883	0.0169604
overlap-320	-0.684148	0.680514	NA	NA	-0.160289	0.923447	NA	NA
overlap-327	-0.731771	0.573682	NA	NA	0.0796183	0.943437	NA	NA
overlap-332	-0.342043	0.770886	NA	NA	0.540892	0.703352	0.382724	0.910701
overlap-333	-0.657151	0.808313	NA	NA	NA	NA	NA	NA
overlap-337	2.03427	0.356966	NA	NA	1.10639	0.542157	1.119	0.614596
overlap-342	0.6787	0.57582	NA	NA	0.208965	0.872238	NA	NA
overlap-345	-1.74397	0.356966	NA	NA	NA	NA	NA	NA
overlap-348	-0.115725	0.937434	NA	NA	0.694719	0.643061	NA	NA
overlap-36	-0.629362	0.730161	NA	NA	NA	NA	NA	NA
overlap-360	-0.119672	0.923872	NA	NA	-0.224226	0.91105	NA	NA
overlap-361	-0.419875	0.810418	NA	NA	-0.466314	0.78164	NA	NA
overlap-367	-0.733447	0.539952	NA	NA	NA	NA	NA	NA
overlap-369	-0.00110393	0.966488	-0.438112	0.606336	0.415131	0.791357	NA	NA
overlap-373	0.361214	0.831843	NA	NA	0.355004	0.885243	NA	NA
overlap-377	0.185288	0.922006	NA	NA	NA	NA	NA	NA
overlap-379	0.296819	0.857421	NA	NA	NA	NA	NA	NA
overlap-381	0.72274	0.77534	NA	NA	NA	NA	NA	NA
overlap-389	-0.241334	0.835475	NA	NA	NA	NA	NA	NA
overlap-39	-0.754613	0.646597	NA	NA	0.706027	0.651722	0.301386	0.864117
overlap-391	-0.956308	0.539952	NA	NA	NA	NA	NA	NA
overlap-45	0.836348	0.654503	NA	NA	NA	NA	NA	NA
overlap-46	0.00506327	0.980231	NA	NA	0.0645412	0.920541	-0.265794	0.936263
overlap-468	0.0747242	0.930463	NA	NA	NA	NA	NA	NA
overlap-480	0.780424	0.865132	NA	NA	0.0546244	0.96571	0.954734	0.417679
overlap-5	0.836444	0.626057	NA	NA	0.0242579	0.970452	0.151748	0.961706
overlap-51	0.338489	0.87352	NA	NA	NA	NA	NA	NA
overlap-52	-1.4234	0.530071	NA	NA	NA	NA	NA	NA
overlap-548	0.0175062	0.938134	NA	NA	NA	NA	NA	NA
overlap-550	0.327827	0.801174	NA	NA	1.06217	0.491521	0.0130673	0.989571
overlap-553	0.565946	0.595111	NA	NA	NA	NA	NA	NA
overlap-554	-0.0603628	0.961406	NA	NA	-0.00214998	0.937839	NA	NA
overlap-561	-0.673521	0.64173	NA	NA	-0.44529	0.781465	NA	NA
overlap-623	-0.3364	0.79535	-0.124017	0.903525	0.311995	0.633444	0.230024	0.833215
overlap-628	0.332404	0.924263	2.25298	0.300444	-0.0632862	0.947278	0.562436	0.523829
overlap-629	-0.183495	0.902705	NA	NA	NA	NA	NA	NA
overlap-635	1.91839	0.585209	NA	NA	NA	NA	-0.400584	0.906193
overlap-636	-0.200367	0.947577	NA	NA	NA	NA	NA	NA
overlap-648	-0.135815	0.920382	NA	NA	NA	NA	NA	NA
overlap-656	0.84538	0.690291	-0.00194948	0.920134	-0.0930481	0.935651	NA	NA
overlap-662	0.380158	0.831843	NA	NA	-0.0889281	0.911667	1.74959	0.0264917
overlap-663	0.669825	0.853267	NA	NA	-0.536316	0.673094	1.53563	0.413341
overlap-722	0.206416	0.878531	NA	NA	NA	NA	NA	NA
overlap-723	0.0753307	0.952631	NA	NA	NA	NA	NA	NA
overlap-728	1.53017	0.539952	NA	NA	0.424871	0.798665	NA	NA
overlap-732	-0.185866	0.881314	0.188035	0.784693	-0.0285959	0.943835	-0.104879	0.967027
overlap-737	-1.42108	0.499583	NA	NA	NA	NA	NA	NA
overlap-8	0.0517933	0.962363	NA	NA	0.187401	0.904948	NA	NA
overlap+100	0.421663	0.804395	NA	NA	0.113472	0.912978	0.906555	0.626228
overlap+107	-0.0351723	0.948439	NA	NA	NA	NA	NA	NA
overlap+108	-0.117316	0.929607	NA	NA	NA	NA	NA	NA
overlap+112	-1.02444	0.530071	0.11065	0.897997	NA	NA	NA	NA
overlap+221	1.26793	0.546156	NA	NA	0.265177	0.852499	NA	NA
overlap+244	-1.68961	0.546156	NA	NA	NA	NA	NA	NA
overlap+249	0.0540735	0.961733	NA	NA	NA	NA	NA	NA
overlap+253	0.713037	0.667821	NA	NA	-0.470596	0.742439	0.782016	0.829325
overlap+256	0.52675	0.676599	0.261906	0.814851	0.00766896	0.966679	0.835575	0.507435
overlap+264	0.094417	0.93858	NA	NA	-1.01306	0.554452	0.276055	0.937833
overlap+278	-0.580182	0.734754	NA	NA	NA	NA	NA	NA
overlap+280	0.930382	0.547309	NA	NA	0.644687	0.749122	NA	NA
overlap+286	0.47291	0.7783	NA	NA	NA	NA	NA	NA
overlap+287	-0.924848	0.530071	NA	NA	NA	NA	NA	NA
overlap+294	-0.109397	0.958397	NA	NA	NA	NA	NA	NA
overlap+298	-0.217023	0.873595	NA	NA	-0.163798	0.840653	-1.24542	0.277181
overlap+300	1.1359	0.702122	0.603803	0.544318	0.408914	0.762451	0.0939555	0.961706
overlap+301	0.667976	0.64173	NA	NA	-0.983031	0.686386	NA	NA
overlap+307	-0.309446	0.923619	NA	NA	-0.396738	0.820671	NA	NA
overlap+309	-0.0609502	0.93858	NA	NA	-0.404571	0.739854	0.00807909	0.993729
overlap+313	0.776275	0.680514	NA	NA	NA	NA	NA	NA
overlap+394	-0.7167	0.640741	NA	NA	-0.35968	0.81032	NA	NA
overlap+398	-1.33897	0.530071	NA	NA	NA	NA	NA	NA
overlap+403	0.529255	0.7891	NA	NA	0.619238	0.635812	NA	NA
overlap+404	-0.521615	0.660056	0.980962	0.360884	0.303638	0.685058	NA	NA
overlap+417	-0.727559	0.64173	NA	NA	NA	NA	NA	NA
overlap+420	0.166305	0.883453	NA	NA	NA	NA	NA	NA
overlap+421	0.783015	0.617591	NA	NA	NA	NA	NA	NA
overlap+423	-0.379565	0.819753	-0.370521	0.513684	-0.0339658	0.958024	NA	NA
overlap+424	-0.1382	0.910702	NA	NA	NA	NA	NA	NA
overlap+434	-1.06266	0.539952	NA	NA	-0.511346	0.780633	NA	NA
overlap+435	-1.88338	0.356966	NA	NA	NA	NA	NA	NA
overlap+439	-1.13336	0.367117	0.540795	0.679722	NA	NA	NA	NA
overlap+441	0.0381012	0.959859	NA	NA	NA	NA	NA	NA
overlap+445	0.98577	0.603004	NA	NA	NA	NA	NA	NA
overlap+451	1.25586	0.539952	NA	NA	NA	NA	NA	NA
overlap+453	-0.383509	0.750131	NA	NA	NA	NA	NA	NA
overlap+454	-0.00381674	0.937263	NA	NA	NA	NA	NA	NA
overlap+455	0.365489	0.819753	NA	NA	NA	NA	NA	NA
overlap+462	0.516746	0.871048	NA	NA	0.184391	0.8924	NA	NA
overlap+507	-0.48103	0.853403	NA	NA	0.582997	0.795636	NA	NA
overlap+510	0.571119	0.632783	NA	NA	-0.203802	0.853085	NA	NA
overlap+518	0.0719501	0.929607	-0.153076	0.692029	0.107181	0.835176	-0.354924	0.626228
overlap+531	0.279651	0.88687	NA	NA	NA	NA	NA	NA
overlap+57	0.199167	0.880808	NA	NA	0.32316	0.703352	0.752175	0.50764
overlap+576	0.422883	0.820618	NA	NA	NA	NA	NA	NA
overlap+578	0.575083	0.70673	NA	NA	0.142579	0.892484	1.09492	0.708509
overlap+581	-0.655953	0.72129	NA	NA	NA	NA	NA	NA
overlap+582	-0.724503	0.645065	NA	NA	0.228598	0.917503	NA	NA
overlap+59	0.691153	0.620091	NA	NA	0.00094598	0.972717	-0.4475	0.867142
overlap+590	-0.763834	0.626057	NA	NA	NA	NA	NA	NA
overlap+598	-0.780538	0.530071	NA	NA	NA	NA	NA	NA
overlap+603	-0.593237	0.784532	NA	NA	NA	NA	0.826687	0.201304
overlap+63	-0.554148	0.742342	NA	NA	-0.306077	0.892296	NA	NA
overlap+673	0.846348	0.635185	NA	NA	NA	NA	NA	NA
overlap+676	-0.353958	0.849773	-1.00669	0.413976	0.383316	0.659566	0.433348	0.635382
overlap+687	1.23691	0.539952	NA	NA	NA	NA	NA	NA
overlap+705	-0.194313	0.84728	NA	NA	0.158898	0.881765	0.91853	0.635382
overlap+709	1.34926	0.550331	NA	NA	NA	NA	NA	NA
overlap+715	0.70643	0.635212	2.8968	0.255251	0.310009	0.741636	1.02119	0.131261
overlap+716	0.63682	0.614803	NA	NA	0.257166	0.67579	1.31462	0.023128
overlap+726	-0.42283	0.819036	NA	NA	NA	NA	NA	NA
overlap+730	0.0831901	0.94681	NA	NA	NA	NA	NA	NA
overlap+733	0.83806	0.784532	NA	NA	NA	NA	NA	NA
overlap+738	-0.0270891	0.968109	0.29472	0.379631	0.0436203	0.912944	-0.234517	0.854627
overlap+740	-0.913301	0.624784	NA	NA	NA	NA	NA	NA
overlap+741	-0.991128	0.530071	-0.895996	0.247329	0.298198	0.659604	NA	NA
overlap+83	-0.709459	0.539952	NA	NA	NA	NA	NA	NA
overlap+86	-1.12154	0.539952	NA	NA	NA	NA	NA	NA
overlap+87	0.79718	0.779208	-0.128523	0.863241	-0.417566	0.782848	0.450892	0.835058
overlap+91	-0.525302	0.770964	NA	NA	NA	NA	NA	NA
overlap+93	0.58324	0.676599	NA	NA	0.6593	0.554452	0.274657	0.876858
overlap+94	0.476831	0.801172	NA	NA	NA	NA	NA	NA
cisNAT-106	NA	NA	2.48526	0.188817	NA	NA	0.201785	0.930988
cisNAT-1355	NA	NA	-0.11808	0.816132	-0.0306025	0.936874	-0.80864	0.00615621
cisNAT-1363	NA	NA	-0.161427	0.652444	-0.0409099	0.914969	-1.32113	8.86473e-06
cisNAT-1453	NA	NA	-1.09066	0.188817	NA	NA	NA	NA
cisNAT-1603	NA	NA	0.425449	0.75329	NA	NA	NA	NA
cisNAT-1671	NA	NA	-0.306088	0.606336	1.03573	0.549937	NA	NA
cisNAT-1696	NA	NA	0.0682538	0.919858	NA	NA	NA	NA
cisNAT-259	NA	NA	0.0615316	0.840029	-0.0748197	0.89717	0.0435508	0.972326
cisNAT-336	NA	NA	-0.0695799	0.825454	0.0545974	0.893051	-0.661074	0.0626826
cisNAT-40	NA	NA	0.371007	0.664439	0.471957	0.691609	-0.662533	0.835058
cisNAT-574	NA	NA	0.150039	0.74684	NA	NA	NA	NA
cisNAT+1074	NA	NA	0.2208	0.810212	-1.0617	0.592123	NA	NA
cisNAT+1214	NA	NA	0.436705	0.557646	0.561096	0.660475	-0.435065	0.877724
cisNAT+1287	NA	NA	0.0241884	0.928572	0.172397	0.703352	-0.478267	0.35263
cisNAT+1367	NA	NA	-0.13962	0.679722	0.0959753	0.839344	-0.686296	0.0815028
cisNAT+1429	NA	NA	-0.0124507	0.941627	0.0822794	0.884794	-0.459174	0.788195
cisNAT+1608	NA	NA	0.213716	0.624986	NA	NA	NA	NA
cisNAT+1625	NA	NA	-1.86966	0.188817	NA	NA	NA	NA
cisNAT+1657	NA	NA	-0.778171	0.509778	NA	NA	NA	NA
cisNAT+1681	NA	NA	-0.22003	0.81433	-0.674164	0.639681	NA	NA
cisNAT+1717	NA	NA	0.0300607	0.922778	-0.0225082	0.940844	-0.609109	0.193098
cisNAT+946	NA	NA	0.0410761	0.875068	0.0105193	0.964059	-0.599849	0.576752
cisNAT+994	NA	NA	-0.728412	0.257165	0.661241	0.549856	0.2966	0.934516
FBti0019232-	NA	NA	0.0967538	0.792123	0.286572	0.764916	NA	NA
FBti0019498+	NA	NA	0.164722	0.546941	0.179726	0.739854	-1.61234	0.0144879
FBti0019529-	NA	NA	-0.0434371	0.900336	-0.430839	0.549937	-1.97042	0.0193635
FBti0019603-	NA	NA	0.425449	0.720629	NA	NA	NA	NA
FBti0019845+	NA	NA	-0.536609	0.808383	NA	NA	NA	NA
FBti0059657-	NA	NA	-0.291811	0.339666	0.173437	0.759259	-0.325328	0.835058
FBti0060634-	NA	NA	0.0422109	0.878697	NA	NA	-1.76595	0.375259
FBti0060685+	NA	NA	-0.133253	0.62667	-0.333643	0.554452	-0.801775	0.375259
FBti0060812+	NA	NA	0.0342223	0.89055	NA	NA	NA	NA
FBti0060872+	NA	NA	0.264748	0.848608	0.115736	0.934681	NA	NA
FBti0061019+	NA	NA	-0.114299	0.861854	NA	NA	NA	NA
FBti0061200-	NA	NA	0.0163824	0.9596	-0.298279	0.69349	-0.606283	0.821178
FBti0061437+	NA	NA	0.821069	0.40429	0.643025	0.561501	NA	NA
FBti0061797+	NA	NA	1.34501	0.188817	0.144489	0.875854	-1.48591	0.374151
FBti0061957-	NA	NA	0.128533	0.863241	NA	NA	NA	NA
FBti0062248-	NA	NA	-0.0860758	0.748074	-0.10132	0.847451	-0.515788	0.523829
FBti0063104-	NA	NA	-0.35641	0.369922	0.38938	0.639978	-0.202265	0.93956
FBti0063148+	NA	NA	-0.533116	0.349628	NA	NA	NA	NA
FBti0063421+	NA	NA	0.0306543	0.932235	0.0811357	0.912944	NA	NA
FBti0063523-	NA	NA	0.10809	0.910214	NA	NA	NA	NA
FBti0063646-	NA	NA	-0.152454	0.652444	-0.0232223	0.939835	-0.516121	0.207773
FBti0063655-	NA	NA	0.0598109	0.824254	0.276428	0.638952	-0.487603	0.772855
FBti0063774+	NA	NA	-0.129707	0.663905	0.0215487	0.944487	-0.558231	0.211085
FBti0063873-	NA	NA	-0.103101	0.765614	0.0740019	0.874562	-0.459705	0.301319
overlap-23	NA	NA	0.0428399	0.928754	NA	NA	NA	NA
overlap-323	NA	NA	-0.578486	0.534085	NA	NA	NA	NA
overlap-619	NA	NA	0.0612766	0.82896	-0.184309	0.697304	-0.718827	0.119875
overlap-724	NA	NA	0.426578	0.618382	NA	NA	NA	NA
overlap+290	NA	NA	0.0670587	0.87532	-0.332387	0.723305	NA	NA
overlap+395	NA	NA	-0.215985	0.812146	0.777465	0.554452	NA	NA
cisNAT-1002	NA	NA	NA	NA	-0.367883	0.785933	NA	NA
cisNAT-101	NA	NA	NA	NA	-0.771943	0.689757	NA	NA
cisNAT-1085	NA	NA	NA	NA	-0.189312	0.923342	NA	NA
cisNAT-1109	NA	NA	NA	NA	-0.471608	0.710281	-2.53858	0.22209
cisNAT-1261	NA	NA	NA	NA	0.379567	0.893051	NA	NA
cisNAT-1281	NA	NA	NA	NA	-0.179999	0.865898	NA	NA
cisNAT-1316	NA	NA	NA	NA	-1.27974	0.554452	NA	NA
cisNAT-1336	NA	NA	NA	NA	-0.188127	0.908511	NA	NA
cisNAT-1351	NA	NA	NA	NA	0.332695	0.851806	NA	NA
cisNAT-1419	NA	NA	NA	NA	-0.0705821	0.947001	0.608135	0.861434
cisNAT-1443	NA	NA	NA	NA	-0.865249	0.638952	NA	NA
cisNAT-1451	NA	NA	NA	NA	0.0814469	0.93969	NA	NA
cisNAT-1565	NA	NA	NA	NA	-1.4284	0.52361	NA	NA
cisNAT-160	NA	NA	NA	NA	-0.695864	0.631779	NA	NA
cisNAT-169	NA	NA	NA	NA	-0.355545	0.762248	NA	NA
cisNAT-1728	NA	NA	NA	NA	1.25581	0.554452	-1.31081	0.576752
cisNAT-1756	NA	NA	NA	NA	0.363146	0.788117	-1.44494	0.572411
cisNAT-177	NA	NA	NA	NA	0.487276	0.681645	NA	NA
cisNAT-179	NA	NA	NA	NA	0.22308	0.848923	NA	NA
cisNAT-210	NA	NA	NA	NA	-0.58769	0.590721	NA	NA
cisNAT-228	NA	NA	NA	NA	-0.563373	0.820838	NA	NA
cisNAT-244	NA	NA	NA	NA	-1.30586	0.542157	NA	NA
cisNAT-245	NA	NA	NA	NA	-0.571004	0.739028	NA	NA
cisNAT-263	NA	NA	NA	NA	0.178275	0.900488	NA	NA
cisNAT-271	NA	NA	NA	NA	-0.131747	0.937172	NA	NA
cisNAT-295	NA	NA	NA	NA	-0.447798	0.825071	NA	NA
cisNAT-312	NA	NA	NA	NA	0.332055	0.874562	NA	NA
cisNAT-326	NA	NA	NA	NA	-0.169159	0.904948	NA	NA
cisNAT-39	NA	NA	NA	NA	-0.135604	0.918308	NA	NA
cisNAT-408	NA	NA	NA	NA	-0.244127	0.878794	NA	NA
cisNAT-427	NA	NA	NA	NA	-0.639059	0.542157	-0.367359	0.854782
cisNAT-431	NA	NA	NA	NA	0.422303	0.788117	NA	NA
cisNAT-437	NA	NA	NA	NA	-0.36967	0.828493	NA	NA
cisNAT-451	NA	NA	NA	NA	-0.183485	0.919641	NA	NA
cisNAT-463	NA	NA	NA	NA	0.0144624	0.938103	NA	NA
cisNAT-465	NA	NA	NA	NA	0.736655	0.67397	NA	NA
cisNAT-50	NA	NA	NA	NA	0.129231	0.912121	NA	NA
cisNAT-503	NA	NA	NA	NA	-1.04596	0.554452	NA	NA
cisNAT-521	NA	NA	NA	NA	0.468182	0.862779	NA	NA
cisNAT-558	NA	NA	NA	NA	0.314566	0.866951	NA	NA
cisNAT-561	NA	NA	NA	NA	0.192748	0.881765	NA	NA
cisNAT-584	NA	NA	NA	NA	-0.298922	0.815452	NA	NA
cisNAT-600	NA	NA	NA	NA	0.0554908	0.939221	NA	NA
cisNAT-623	NA	NA	NA	NA	0.0412744	0.93037	NA	NA
cisNAT-645	NA	NA	NA	NA	-1.20533	0.554452	NA	NA
cisNAT-653	NA	NA	NA	NA	0.879171	0.711906	NA	NA
cisNAT-655	NA	NA	NA	NA	-0.468412	0.573663	NA	NA
cisNAT-661	NA	NA	NA	NA	-1.13648	0.554452	NA	NA
cisNAT-708	NA	NA	NA	NA	0.769774	0.643061	NA	NA
cisNAT-713	NA	NA	NA	NA	-1.6489	0.478931	NA	NA
cisNAT-716	NA	NA	NA	NA	-0.231269	0.890077	NA	NA
cisNAT-737	NA	NA	NA	NA	0.432862	0.754658	NA	NA
cisNAT-740	NA	NA	NA	NA	0.419698	0.7923	NA	NA
cisNAT-78	NA	NA	NA	NA	0.0393176	0.922074	NA	NA
cisNAT-801	NA	NA	NA	NA	-0.554481	0.799071	NA	NA
cisNAT-833	NA	NA	NA	NA	-0.246625	0.872025	NA	NA
cisNAT-903	NA	NA	NA	NA	0.27558	0.861752	NA	NA
cisNAT-92	NA	NA	NA	NA	-0.797355	0.634361	NA	NA
cisNAT-924	NA	NA	NA	NA	-0.961644	0.65393	NA	NA
cisNAT-926	NA	NA	NA	NA	-0.807421	0.701341	NA	NA
cisNAT-927	NA	NA	NA	NA	-2.04594	0.364072	NA	NA
cisNAT-934	NA	NA	NA	NA	-0.746211	0.707192	NA	NA
cisNAT-943	NA	NA	NA	NA	-0.567427	0.809736	NA	NA
cisNAT-951	NA	NA	NA	NA	-0.946501	0.554452	NA	NA
cisNAT+101	NA	NA	NA	NA	-0.639602	0.554452	NA	NA
cisNAT+1030	NA	NA	NA	NA	-0.036517	0.932117	NA	NA
cisNAT+1055	NA	NA	NA	NA	-0.189312	0.93037	NA	NA
cisNAT+109	NA	NA	NA	NA	-0.506769	0.364072	NA	NA
cisNAT+1091	NA	NA	NA	NA	-0.45439	0.771864	NA	NA
cisNAT+11	NA	NA	NA	NA	-0.677296	0.7204	NA	NA
cisNAT+1101	NA	NA	NA	NA	0.494773	0.816092	NA	NA
cisNAT+1114	NA	NA	NA	NA	-0.788224	0.613345	NA	NA
cisNAT+1116	NA	NA	NA	NA	-0.237438	0.750569	NA	NA
cisNAT+1166	NA	NA	NA	NA	-1.27039	0.542157	NA	NA
cisNAT+1173	NA	NA	NA	NA	-0.456035	0.762248	NA	NA
cisNAT+1190	NA	NA	NA	NA	-1.02703	0.675501	NA	NA
cisNAT+1230	NA	NA	NA	NA	-0.268848	0.889898	NA	NA
cisNAT+1281	NA	NA	NA	NA	0.428352	0.739854	NA	NA
cisNAT+1304	NA	NA	NA	NA	-0.152286	0.915247	NA	NA
cisNAT+1319	NA	NA	NA	NA	0.325836	0.853473	NA	NA
cisNAT+1341	NA	NA	NA	NA	0.582997	0.839344	NA	NA
cisNAT+1344	NA	NA	NA	NA	0.934065	0.638952	NA	NA
cisNAT+1351	NA	NA	NA	NA	0.875363	0.69712	NA	NA
cisNAT+1366	NA	NA	NA	NA	-0.997585	0.554452	NA	NA
cisNAT+1397	NA	NA	NA	NA	-0.575312	0.822091	NA	NA
cisNAT+1408	NA	NA	NA	NA	0.439398	0.68184	NA	NA
cisNAT+1415	NA	NA	NA	NA	-1.14467	0.542157	NA	NA
cisNAT+1418	NA	NA	NA	NA	-1.26707	0.441787	NA	NA
cisNAT+1428	NA	NA	NA	NA	-0.427245	0.820228	NA	NA
cisNAT+1453	NA	NA	NA	NA	1.18821	0.66179	NA	NA
cisNAT+1491	NA	NA	NA	NA	0.239279	0.874104	NA	NA
cisNAT+1562	NA	NA	NA	NA	0.559806	0.795589	NA	NA
cisNAT+1569	NA	NA	NA	NA	-0.706593	0.748145	NA	NA
cisNAT+1570	NA	NA	NA	NA	0.415069	0.885505	NA	NA
cisNAT+1591	NA	NA	NA	NA	-1.00114	0.542157	NA	NA
cisNAT+1614	NA	NA	NA	NA	0.23388	0.69188	-1.63068	0.306346
cisNAT+1689	NA	NA	NA	NA	-0.00472065	0.947278	NA	NA
cisNAT+1701	NA	NA	NA	NA	-0.0819428	0.944884	NA	NA
cisNAT+1709	NA	NA	NA	NA	-0.365619	0.764916	-1.65207	0.35263
cisNAT+1756	NA	NA	NA	NA	-0.269156	0.796885	-2.14554	0.220792
cisNAT+231	NA	NA	NA	NA	0.637993	0.81032	NA	NA
cisNAT+24	NA	NA	NA	NA	-0.623511	0.67397	NA	NA
cisNAT+245	NA	NA	NA	NA	-0.156601	0.906099	-0.4392	0.886003
cisNAT+352	NA	NA	NA	NA	1.23581	0.542157	NA	NA
cisNAT+369	NA	NA	NA	NA	0.693604	0.676076	0.4505	0.877724
cisNAT+386	NA	NA	NA	NA	0.271075	0.884196	NA	NA
cisNAT+401	NA	NA	NA	NA	-0.645751	0.761463	NA	NA
cisNAT+406	NA	NA	NA	NA	0.271813	0.853401	NA	NA
cisNAT+414	NA	NA	NA	NA	0.535067	0.703352	NA	NA
cisNAT+42	NA	NA	NA	NA	0.218871	0.92255	-0.687069	0.835058
cisNAT+431	NA	NA	NA	NA	-1.03487	0.671071	NA	NA
cisNAT+435	NA	NA	NA	NA	-0.493836	0.554452	NA	NA
cisNAT+455	NA	NA	NA	NA	-0.080879	0.947172	NA	NA
cisNAT+468	NA	NA	NA	NA	-0.856642	0.561721	NA	NA
cisNAT+488	NA	NA	NA	NA	-0.53418	0.697101	NA	NA
cisNAT+491	NA	NA	NA	NA	-0.0348694	0.927213	NA	NA
cisNAT+501	NA	NA	NA	NA	0.260691	0.874104	NA	NA
cisNAT+516	NA	NA	NA	NA	0.431613	0.833045	NA	NA
cisNAT+517	NA	NA	NA	NA	1.10709	0.555952	NA	NA
cisNAT+558	NA	NA	NA	NA	-0.960522	0.542157	NA	NA
cisNAT+562	NA	NA	NA	NA	0.433728	0.781084	-0.0323052	0.986172
cisNAT+594	NA	NA	NA	NA	-1.49465	0.433573	NA	NA
cisNAT+714	NA	NA	NA	NA	0.415069	0.853802	NA	NA
cisNAT+729	NA	NA	NA	NA	-1.02529	0.542157	NA	NA
cisNAT+736	NA	NA	NA	NA	-0.803382	0.809736	NA	NA
cisNAT+737	NA	NA	NA	NA	-0.286834	0.838933	NA	NA
cisNAT+741	NA	NA	NA	NA	0.920662	0.546357	NA	NA
cisNAT+761	NA	NA	NA	NA	-0.706682	0.629118	NA	NA
cisNAT+77	NA	NA	NA	NA	0.0709698	0.935896	NA	NA
cisNAT+855	NA	NA	NA	NA	-1.08685	0.636178	NA	NA
cisNAT+86	NA	NA	NA	NA	0.273095	0.881765	NA	NA
cisNAT+874	NA	NA	NA	NA	-0.160635	0.926016	NA	NA
cisNAT+875	NA	NA	NA	NA	-0.148937	0.917503	NA	NA
cisNAT+877	NA	NA	NA	NA	-0.188127	0.923078	NA	NA
cisNAT+900	NA	NA	NA	NA	0.59787	0.740225	NA	NA
cisNAT+974	NA	NA	NA	NA	-0.64099	0.764206	NA	NA
cisNAT+975	NA	NA	NA	NA	-0.410174	0.867089	NA	NA
cisNAT+991	NA	NA	NA	NA	-0.710154	0.764206	NA	NA
cisNAT+996	NA	NA	NA	NA	0.9422	0.631779	NA	NA
FBti0018899-	NA	NA	NA	NA	-0.680299	0.762248	NA	NA
FBti0018927-	NA	NA	NA	NA	0.795997	0.746776	NA	NA
FBti0018990-	NA	NA	NA	NA	1.56348	0.542157	NA	NA
FBti0019064-	NA	NA	NA	NA	0.452142	0.761205	NA	NA
FBti0019145-	NA	NA	NA	NA	0.524467	0.749122	NA	NA
FBti0019179+	NA	NA	NA	NA	-1.03487	0.574259	NA	NA
FBti0019224-	NA	NA	NA	NA	0.894249	0.685156	NA	NA
FBti0019341+	NA	NA	NA	NA	0.373639	0.725259	NA	NA
FBti0019347+	NA	NA	NA	NA	0.811171	0.617535	-0.0638467	0.970484
FBti0019356+	NA	NA	NA	NA	0.0103583	0.917503	NA	NA
FBti0019391+	NA	NA	NA	NA	0.537273	0.739854	NA	NA
FBti0019434-	NA	NA	NA	NA	-0.183485	0.919641	NA	NA
FBti0019591+	NA	NA	NA	NA	-0.0348694	0.926016	NA	NA
FBti0019617+	NA	NA	NA	NA	0.812383	0.675501	NA	NA
FBti0019622-	NA	NA	NA	NA	0.648423	0.364072	-0.743561	0.82401
FBti0019628-	NA	NA	NA	NA	1.14509	0.201491	NA	NA
FBti0019749+	NA	NA	NA	NA	0.811893	0.721769	NA	NA
FBti0019826+	NA	NA	NA	NA	0.702577	0.74805	NA	NA
FBti0019977-	NA	NA	NA	NA	-0.0345122	0.956844	NA	NA
FBti0020021+	NA	NA	NA	NA	0.367917	0.84344	NA	NA
FBti0020025+	NA	NA	NA	NA	-1.05707	0.581491	NA	NA
FBti0020045+	NA	NA	NA	NA	-0.997174	0.554452	NA	NA
FBti0020061-	NA	NA	NA	NA	-0.25868	0.833172	NA	NA
FBti0020099+	NA	NA	NA	NA	-0.843525	0.697304	NA	NA
FBti0020158-	NA	NA	NA	NA	-1.42826	0.61029	NA	NA
FBti0020192+	NA	NA	NA	NA	0.783162	0.542157	NA	NA
FBti0020205-	NA	NA	NA	NA	0.876099	0.703352	NA	NA
FBti0059684-	NA	NA	NA	NA	-0.294277	0.875854	NA	NA
FBti0059782-	NA	NA	NA	NA	-0.527706	0.645204	1.18736	0.435392
FBti0059809-	NA	NA	NA	NA	0.128025	0.911183	-0.17872	0.94955
FBti0059983+	NA	NA	NA	NA	1.61369	0.498176	NA	NA
FBti0061415-	NA	NA	NA	NA	0.339368	0.856933	NA	NA
FBti0061485+	NA	NA	NA	NA	1.50795	0.364072	NA	NA
FBti0062035+	NA	NA	NA	NA	-0.808644	0.620064	NA	NA
FBti0062231+	NA	NA	NA	NA	0.728948	0.554452	NA	NA
FBti0062605-	NA	NA	NA	NA	-0.237804	0.874104	NA	NA
FBti0062605+	NA	NA	NA	NA	-0.641714	0.364072	NA	NA
FBti0062676+	NA	NA	NA	NA	-0.479784	0.837969	NA	NA
FBti0062683+	NA	NA	NA	NA	0.460382	0.80108	NA	NA
FBti0062789+	NA	NA	NA	NA	0.0903171	0.931813	NA	NA
FBti0062804+	NA	NA	NA	NA	0.345018	0.885505	NA	NA
FBti0063149-	NA	NA	NA	NA	-0.341324	0.84344	NA	NA
FBti0063149+	NA	NA	NA	NA	-0.238153	0.881765	NA	NA
overlap-206	NA	NA	NA	NA	-0.948367	0.544507	NA	NA
overlap-351	NA	NA	NA	NA	0.614277	0.837179	NA	NA
overlap-652	NA	NA	NA	NA	1.42026	0.554452	NA	NA
overlap+299	NA	NA	NA	NA	0.28473	0.799653	NA	NA
overlap+666	NA	NA	NA	NA	-0.0753085	0.93969	NA	NA
cisNAT-1022	NA	NA	NA	NA	NA	NA	0.501548	0.836934
cisNAT-1263	NA	NA	NA	NA	NA	NA	0.844446	0.720149
cisNAT-1305	NA	NA	NA	NA	NA	NA	0.503366	0.863377
cisNAT-1750	NA	NA	NA	NA	NA	NA	-0.616557	0.859195
cisNAT-269	NA	NA	NA	NA	NA	NA	0.238887	0.932117
cisNAT-369	NA	NA	NA	NA	NA	NA	0.23808	0.93956
cisNAT-935	NA	NA	NA	NA	NA	NA	0.0534852	0.974776
cisNAT+1411	NA	NA	NA	NA	NA	NA	-0.764624	0.805298
cisNAT+1435	NA	NA	NA	NA	NA	NA	0.342136	0.916104
cisNAT+1471	NA	NA	NA	NA	NA	NA	-0.681991	0.861434
cisNAT+1550	NA	NA	NA	NA	NA	NA	-0.937279	0.724642
cisNAT+1587	NA	NA	NA	NA	NA	NA	0.452023	0.842487
cisNAT+1665	NA	NA	NA	NA	NA	NA	-0.250251	0.930988
cisNAT+1699	NA	NA	NA	NA	NA	NA	0.762494	0.788195
cisNAT+1735	NA	NA	NA	NA	NA	NA	0.158981	0.961706
cisNAT+256	NA	NA	NA	NA	NA	NA	0.205765	0.93956
cisNAT+354	NA	NA	NA	NA	NA	NA	0.85591	0.799505
cisNAT+769	NA	NA	NA	NA	NA	NA	-0.628493	0.850475
cisNAT+777	NA	NA	NA	NA	NA	NA	1.00968	0.721501
cisNAT+899	NA	NA	NA	NA	NA	NA	-0.191133	0.94955
FBti0061163-	NA	NA	NA	NA	NA	NA	0.64531	0.850939
FBti0063349-	NA	NA	NA	NA	NA	NA	-1.00391	0.766119
overlap-25	NA	NA	NA	NA	NA	NA	1.35162	0.635382
